# Supplementary material
Source: PubMed Central journal article supplement (PMC4315046)
Supplement: jp511492q_si_001.pdf [file jp511492q_si_001.pdf]

## **Strategies for the Hyperpolarization of Acetonitrile and Related Ligands by SABRE**

*Ryan E. Mewis, Richard A. Green, Martin C. R. Cockett, Michael J. Cowley, Simon B. Duckett\*, Gary G. R. Green, Richard O. John, Peter. J. Rayner and David C. Williamson*

Centre for Hyperpolarisation in Magnetic Resonance, University of York, Heslington, York, YO10 5DD, UK. Tel: +44 1904 322564; E-mail: [simon.duckett@york.ac.uk](mailto:simon.duckett@york.ac.uk).

## Supplementary Information

|                                                                                                                                        |     |
|----------------------------------------------------------------------------------------------------------------------------------------|-----|
| 1. General considerations .....                                                                                                        | 3S  |
| 2. Multinuclear NMR characterisation data for 3 in $d_4$ -MeOH .....                                                                   | 5S  |
| 3. $T_1$ measurements .....                                                                                                            | 7S  |
| 4. IR spectra of $\text{Ir}(\text{CO})_2(\text{IMes-}h_{24})\text{Cl}$ and $\text{Ir}(\text{CO})_2(\text{IMes-}d_{22})\text{Cl}$ ..... | 8S  |
| 5. $^1\text{H}$ polarization of A in the absence of pyridine .....                                                                     | 9S  |
| 6. $^{13}\text{C}$ NMR spectrum of hyperpolarized A .....                                                                              | 11S |
| 7. $^1\text{H}$ NMR spectra of hyperpolarized B as a function of the PTF .....                                                         | 12S |
| 8. $^{13}\text{C}$ NMR spectra of B .....                                                                                              | 13S |
| 9. $^1\text{H}$ NMR spectra of hyperpolarized C as a function of PTF .....                                                             | 14S |
| 10. $^{13}\text{C}$ NMR measurement of C .....                                                                                         | 15S |
| 11. Heteronuclear only <i>parahydrogen</i> spectroscopy (OPSY) .....                                                                   | 17S |
| 12. Heteronuclear OPSY sequence used for exciting $^1\text{H}$ and $^{13}\text{C}$ spins simultaneously .....                          | 18S |
| 13. $^1\text{H}$ NMR spectrum of C acquired using the sequence detailed in sFigure 13 .....                                            | 19S |
| 14. Hyperpolarization of propionitrile using 1 .....                                                                                   | 20S |
| 15. Hyperpolarization of <i>trans</i> -3-hexenedinitrile using 1 .....                                                                 | 21S |
| 16. Hyperpolarization of benzylnitrile using 1 .....                                                                                   | 23S |
| 17. Hyperpolarization of benzonitrile using 1 .....                                                                                    | 24S |
| 18. Couplings and chemical shifts used to produce the theoretical spectra .....                                                        | 25S |
| 19. DFT general considerations .....                                                                                                   | 26S |
| 20. DFT calculations for complexes 2 and 3 .....                                                                                       | 27S |
| 21. DFT calculations for the binding modes of <i>cis</i> - and <i>trans</i> -3-hexenedinitrile .....                                   | 29S |
| 22. DFT vibrational calculations for $\text{Ir}(\text{NHC})(\text{CO})_2\text{Cl}$ where NHC= IMes- $d_{22}$ or IMes .....             | 30S |
| 23. Cartesian Coordinates, total electronic energy and zero point energies obtained from DFT calculations .....                        | 31S |

# 1. General considerations

## Materials

All materials and deuterated solvents were purchased from Sigma-Aldrich and used as received.  $[\text{Ir}(\text{IMes})(\text{COD})\text{Cl}]^1$ , **1**, and  $[\text{Ir}(\text{IMes-}d_{22})(\text{COD})\text{Cl}]^2$  were synthesized following established procedures.

## NMR Equipment

NMR measurements were made using a Bruker 400 MHz Avance III spectrometer equipped with either a TXO flow probe linked directly to the Polarizer<sup>3</sup> (for flow experiments) or a BBI probe (for shake measurements) using 5 mm NMR samples. All measurements were made at 298 K.

*Parahydrogen* was prepared by flowing hydrogen gas over either charcoal at 30 K in a house-built apparatus<sup>4</sup> (used in shake measurements) or an iron oxide catalyst at 36 K in a Bruker-built polarizer (used in flow experiments).

## Shake measurements

A typical experiment used, a Young's capped NMR tube containing **1** (~2 mg), MeCN (0.1 M) and pyridine (0.025 M) in  $d_4$ -MeOH (0.6 ml). Samples were degassed using Schlenk line techniques before introducing *parahydrogen* into the tube at a pressure of 3 bar. The sample was then shaken in an appropriate region of the fringe field of the magnet to effect polarization transfer for 10 s. After this period, samples were dropped in to the spectrometer and data acquisition begun. Typical NMR spectra are described in the manuscript and presented in sections s5-s17.

## Flow measurements

For flow measurements, samples typically consisted of **1** (10 mg), MeCN (0.1 M) and pyridine (0.025 M) in  $d_4$ -MeOH (3 ml).

A schematic representation of the Polarizer used for flow measurements is shown in sScheme 1. The Mixing Chamber (MC) is housed within a tunable copper coil (0 to  $\pm 150$  G). Whilst the coil on a 0 G setting delivers no field, the resultant field experienced by the sample is not zero and is better approximated by the Earth's field. All magnitudes of the magnetic fields in which polarization transfer occurs (PTF) are stated without correction for this local field. The MC houses the solvent, catalyst and substrates whose amounts are 5 times higher than those used in the shake measurements (although concentrations were kept the same). Liquid and gas flow is computer-controlled via the pulse program. As such, the system is entirely automated.

*Parahydrogen* is first introduced into the MC to activate the catalyst for 6 s. Nitrogen gas is used to shuttle the hyperpolarized solution from the MC to the NMR probehead for measurement. The transportation time was calibrated to 2.9 s. A further delay of 0.5 s was allowed for settling of the sample prior to signal acquisition (1 s). Once catalyst activation is complete, the SABRE effect can be detected as enhanced resonances for both the free and bound MeCN.

For experiments that require more than one scan, processes 1-4, as shown in sScheme 1, are repeated  $n$  times, where  $n$  is the number of scans.

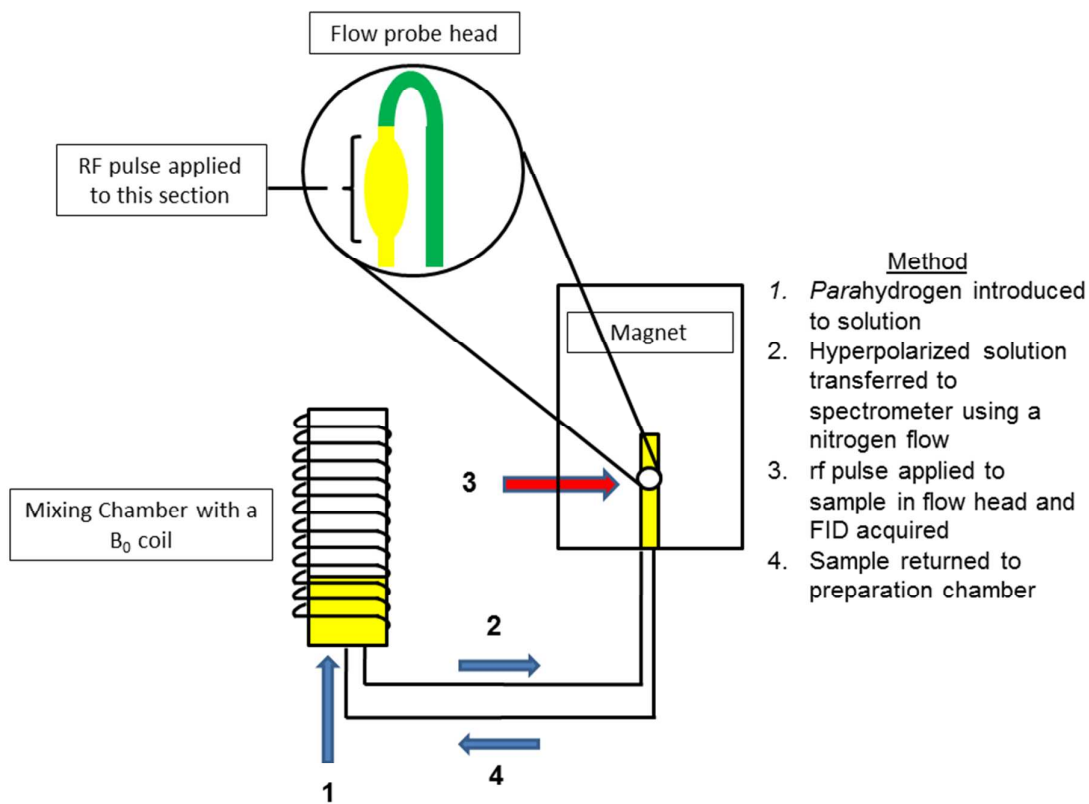

sScheme 1 : Schematic of the Polarizer, the hyperpolarization process and its subsequent NMR analysis.

## 2. Multinuclear NMR characterisation data for 3 in $d_4$ -MeOH

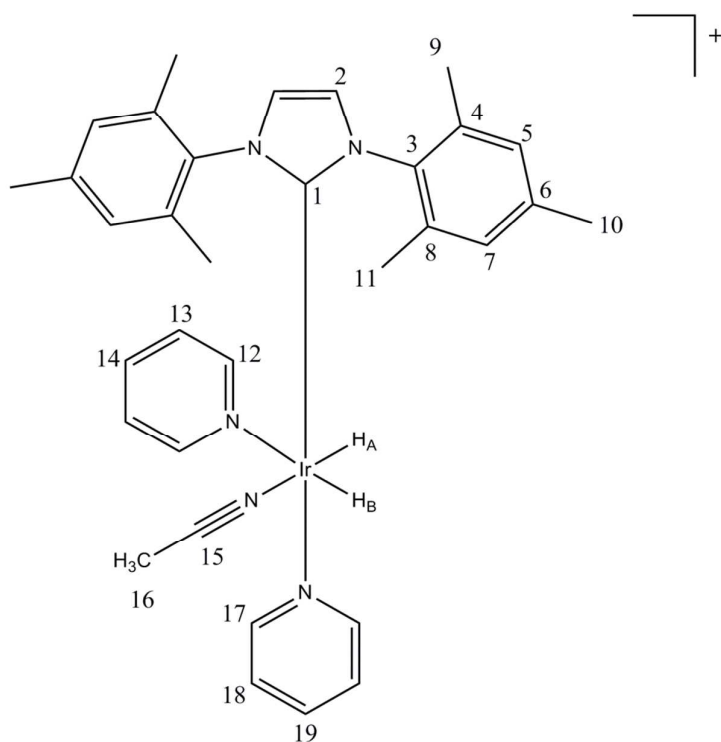

Figure 1: Labelling scheme for the structure of 3 (chloride anion omitted)

Table 1: Multinuclear NMR data for 3 collected in  $d_4$ -MeOH.

| $^1\text{H}$ chemical shift / ppm | $^{13}\text{C}$ chemical shift / ppm | Nucleus label/number |
|-----------------------------------|--------------------------------------|----------------------|
| -20.56                            |                                      | H <sub>A</sub>       |
| -22.12                            |                                      | H <sub>B</sub>       |
| 8.33                              | 155.13                               | 17                   |
| 8.30                              | 156.46                               | 12                   |
| 7.82                              | 136.16                               | 14                   |
| 7.72                              | 136.38                               | 19                   |
| 7.18                              | 125.47                               | 13                   |
| 7.08                              | 125.12                               | 18                   |
|                                   | 137.56                               | 3                    |
| 7.07                              | 128.37                               | 5                    |
| 6.86                              | 128.56                               | 7                    |
| 7.11                              | 122.25                               | 2                    |
| 2.36                              | 19.86                                | 10                   |
| 2.2                               | 17.14                                | 11                   |
| 1.87                              | 16.91                                | 9                    |
| 2.16                              | 21.94                                | 16                   |
|                                   | 135.91                               | 8                    |
|                                   | 135.83                               | 4                    |
|                                   | 138.5                                | 6                    |
|                                   | 149.65                               | 1                    |
|                                   | 117.8                                | 15                   |

Hydride splittings to protons located at positions 12 and 16 were determined to be ~1.2 Hz and ~2.1Hz respectively. The hydride-hydride splitting was found to be -7.56 Hz

**<sup>15</sup>N NMR data**

$J_{\text{NH}}$  pyridine *trans* to hydride H<sub>B</sub> = 20.5 Hz (<sup>15</sup>N δ 252.5)

$J_{\text{NH}}$  MeCN *trans* to hydride H<sub>A</sub> = 25 Hz (<sup>15</sup>N δ 190.6)

<sup>15</sup>N chemical shift of pyridine *trans* to IMes = δ 231.00

### 3. $T_1$ measurements

Table 2:  $T_1$  values of pyridine and A under specified conditions.

| Catalyst | Vacuum + Py /s |          |          | H <sub>2</sub> + Py /s |          |          | Vacuum + Py + MeCN /s |          |          |    | H <sub>2</sub> + Py + MeCN /s |          |          |    |
|----------|----------------|----------|----------|------------------------|----------|----------|-----------------------|----------|----------|----|-------------------------------|----------|----------|----|
|          | <i>o</i>       | <i>p</i> | <i>m</i> | <i>o</i>               | <i>P</i> | <i>m</i> | <i>o</i>              | <i>p</i> | <i>m</i> | Me | <i>o</i>                      | <i>m</i> | <i>P</i> | Me |
| <b>1</b> | 29             | 30       | 26       | 13                     | 19       | 15       | 20                    | 23       | 20       | 8  | 21                            | 25       | 20       | 12 |

N.B. *o*, *m* and *p* refer to the *ortho*, *meta* and *para* <sup>1</sup>H resonances of pyridine, respectively. Me represents the methyl group of A.

Table 3:  $T_1$  values for the labelled <sup>13</sup>C nucleus of B or C under specified conditions.

| MeCN labelled material | $T_1$ of the labelled <sup>13</sup> C resonance |                                                                |
|------------------------|-------------------------------------------------|----------------------------------------------------------------|
|                        | Under vacuum in presence of <b>1</b> /s         | Under H <sub>2</sub> atmosphere in the presence of <b>1</b> /s |
| <b>B</b>               | 15.1                                            | 13.6                                                           |
| <b>C</b>               | 15.6                                            | 14.8                                                           |

Table 4:  $T_1$  values of the methyl protons of B and C under specified conditions

| MeCN labelled material | $T_1$ of the methyl <sup>1</sup> H resonance                     |
|------------------------|------------------------------------------------------------------|
|                        | Under a H <sub>2</sub> atmosphere in the presence of <b>1</b> /s |
| <b>B</b>               | 6.64                                                             |
| <b>C</b>               | 7.07                                                             |

The  $T_1$  of the methyl protons of A in the presence of *d*<sub>5</sub>-pyridine and Ir(*d*<sub>22</sub>-IMes)(COD)Cl in MeOH was found to be 16.2 s.

All measurements were made using a sample consisting of **1** (2 mg) or Ir(*d*<sub>22</sub>-IMes)(COD)Cl (2 mg), 3.1 μL MeCN, 0.75 μL py in 0.6 ml of *d*<sub>4</sub>-MeOH.

A, B, and C correspond to the acetonitrile isotopomers as shown in Scheme 1 in the main text.

#### 4. IR spectra of $\text{Ir}(\text{CO})_2(\text{IMes-}h_{24})\text{Cl}$ and $\text{Ir}(\text{CO})_2(\text{IMes-}d_{22})\text{Cl}$

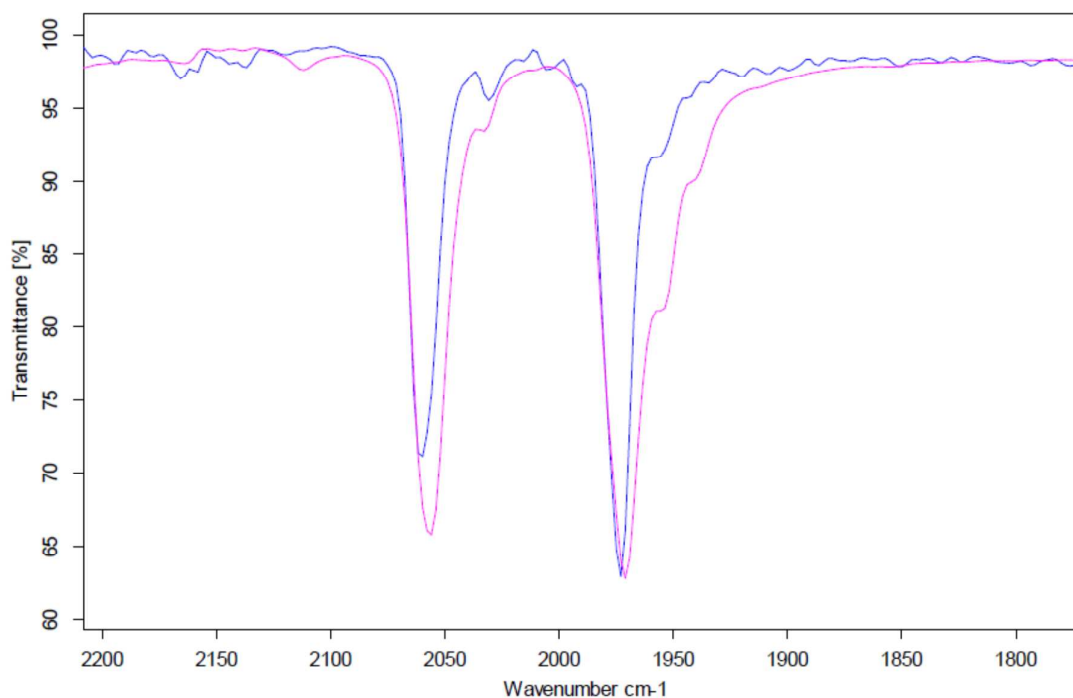

Figure 2: CO stretching region of the mid-IR region of  $\text{Ir}(\text{CO})_2(\text{IMes-}h_{24})\text{Cl}$  (blue line) and  $\text{Ir}(\text{CO})_2(\text{IMes-}d_{22})\text{Cl}$  (violet line).

IR data was collected using a Bruker Tensor 37 FT-IR spectrometer fitted with a platinum ATR at a resolution of  $4 \text{ cm}^{-1}$ . The stretching frequencies of CO in  $\text{Ir}(\text{CO})_2(\text{IMes-}h_{24})\text{Cl}$  and  $\text{Ir}(\text{CO})_2(\text{IMes-}d_{22})\text{Cl}$  are  $2061$  and  $1973 \text{ cm}^{-1}$  and  $2057$  and  $1971 \text{ cm}^{-1}$  respectively. The synthesis of the two carbonyl complexes followed a literature procedure.<sup>5</sup>



## 5. $^1\text{H}$ polarization of A in the absence of pyridine

Initial experiments involved hyperpolarizing MeCN at 65 G. Initially, the enhancement for pyridine was 8.2-fold but very quickly (~5 mins) dropped to 3.2-fold. After one hour the enhancement was only 2.8-fold.

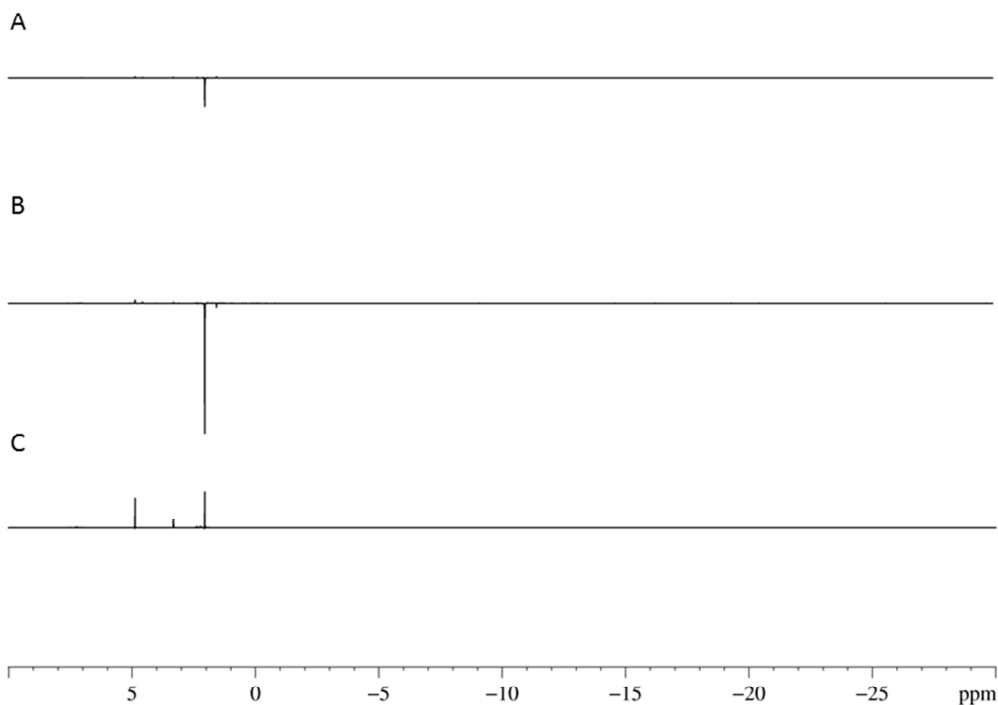

Figure 3:  $^1\text{H}$  NMR traces of a sample consisting of A (3.1  $\mu\text{L}$ ) and 1 (2 mg) in  $d_4$ -MeOH (0.6 ml) after polarization transfer in a PTF of 65 G: after one hour (A); initially (B); and when the sample had fully relaxed back to thermal equilibrium (C).

After one hour, phenylacetylene was added to act as a sacrificial alkyne. This material was observed to hydrogenate to its alkene and alkane derivatives, but the methyl group of MeCN was not observed to be enhanced after subsequent polarization transfer at 65 G.

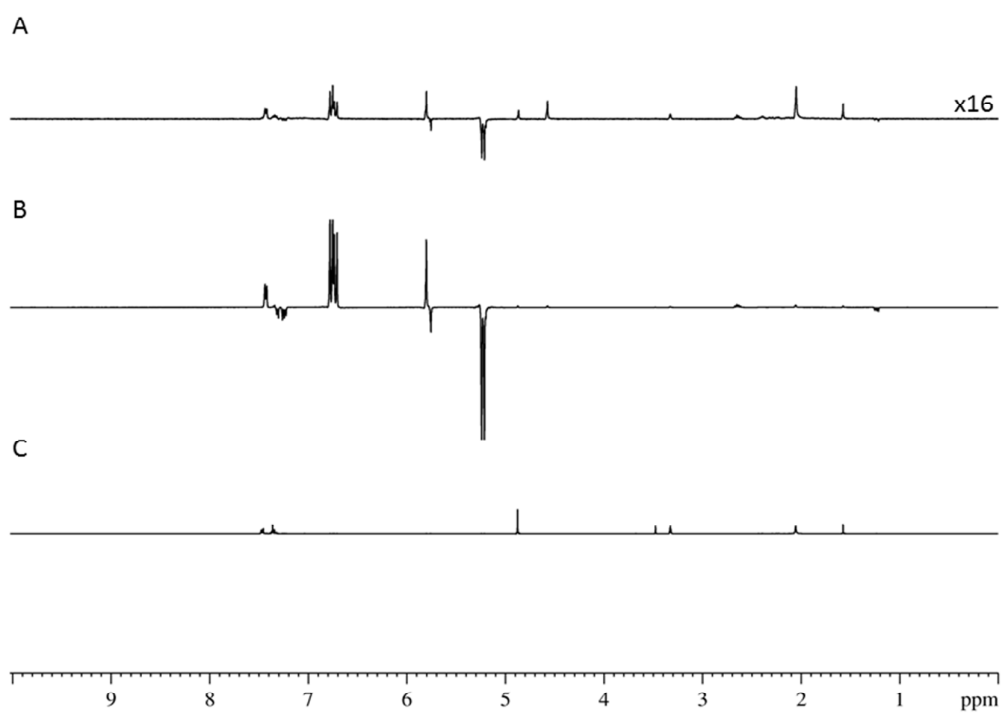

Figure 4:  $^1\text{H}$  NMR traces of a sample consisting of A (3.1  $\mu\text{L}$ ), phenylacetylene (3.3  $\mu\text{L}$  (10 equivalents)) and 1 (2 mg) in  $d_4$ -MeOH (0.6 ml) after polarization transfer in a PTF of 65 G: after one hour (A); initially (B); and when the sample has fully relaxed to thermal equilibrium (C).

## 6. $^{13}\text{C}$ NMR spectrum of hyperpolarized A

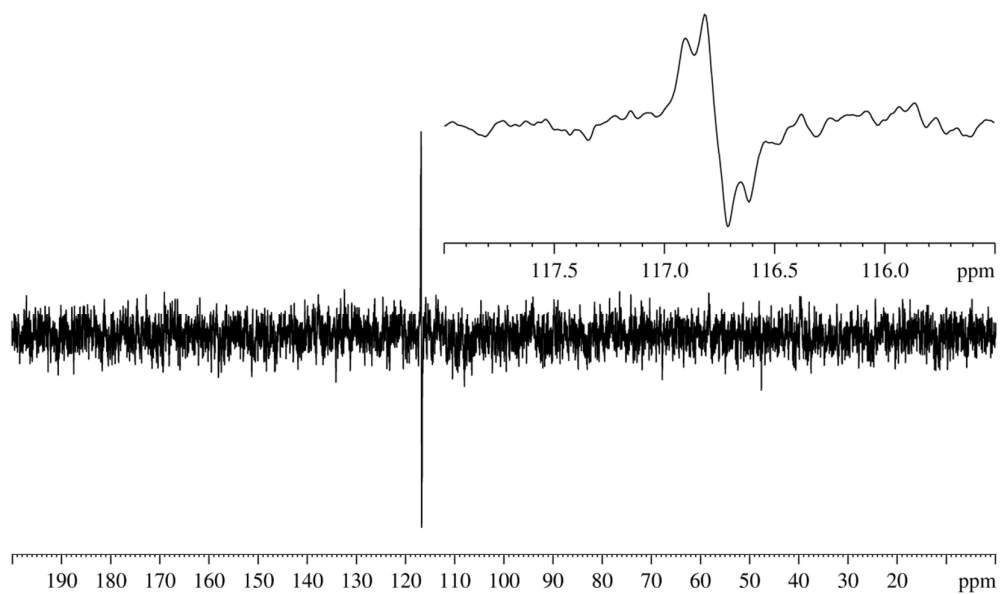

Figure 5:  $^{13}\text{C}$  NMR trace of a sample consisting of A (15.5  $\mu\text{L}$ ),  $d_5$ -pyridine (3.75  $\mu\text{L}$ ) and 1 (10 mg) in  $d_4$ -MeOH (3 ml) after polarization transfer in a PTF of 0 G. The insert shows the splitting of the quaternary peak.

## 7. $^1\text{H}$ NMR spectra of hyperpolarized B as a function of the PTF

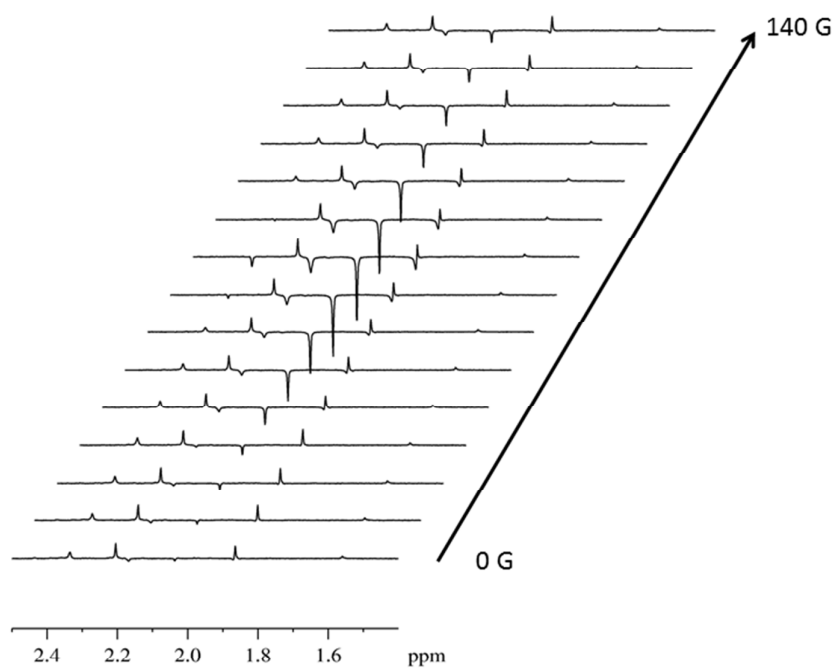

Figure 6:  $^1\text{H}$  field plot for a sample consisting of B (15.5  $\mu\text{L}$ ),  $d_5$ -pyridine (3.75  $\mu\text{L}$ ), 1 (10 mg) in  $d_4$ -MeOH (3 ml) after polarization transfer at the field indicated. Traces are displayed in 10 G steps.

## 8. $^{13}\text{C}$ NMR spectra of B

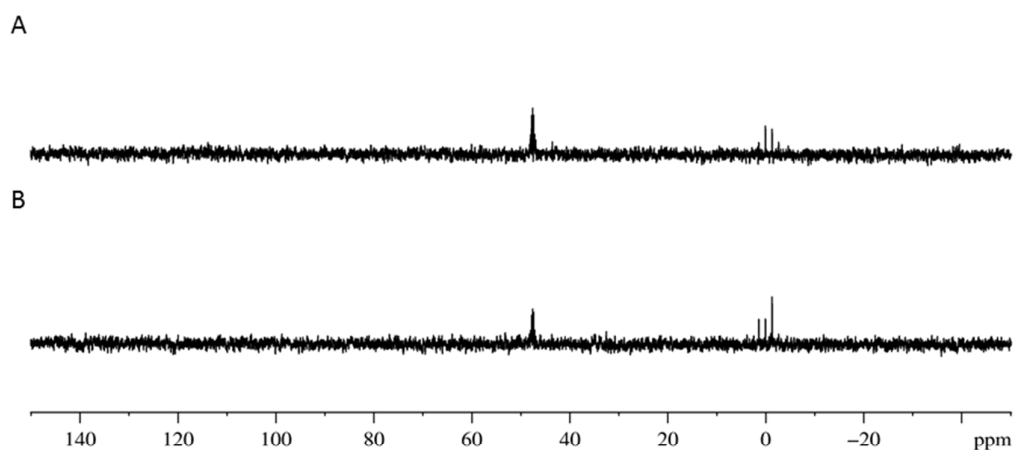

Figure 7:  $^{13}\text{C}$  NMR spectra of a sample consisting of B (15.5  $\mu\text{L}$ ),  $d_5$ -pyridine (3.75  $\mu\text{L}$ ), 1 (10 mg) in  $d_4$ -MeOH (3 ml) at thermal equilibrium (A) and after polarization transfer at a PTF of 0.5 G (B). Traces collected using 8 scans.

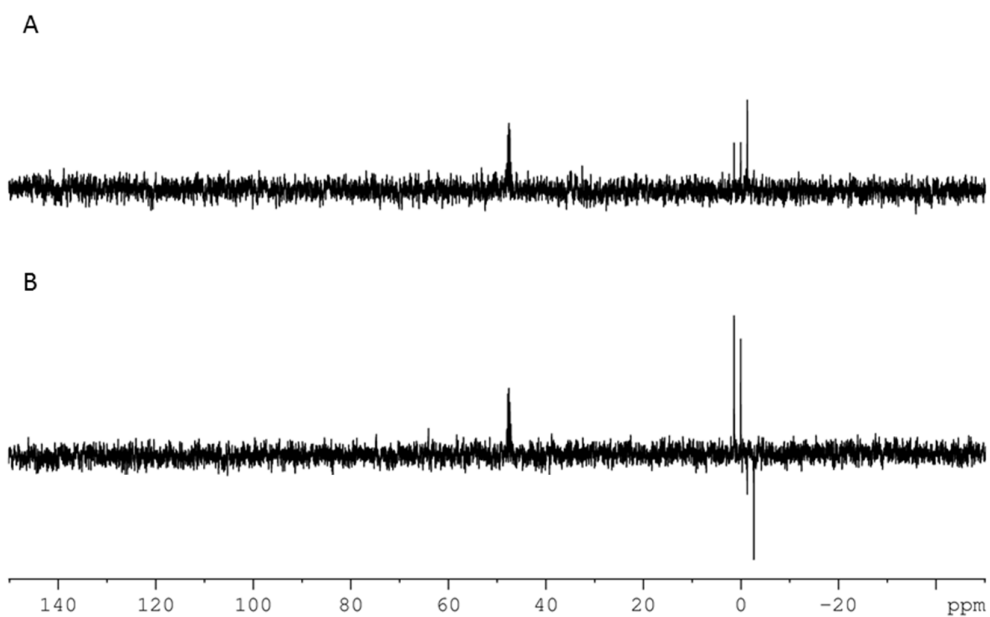

Figure 8:  $^{13}\text{C}$  NMR spectra of a sample consisting of B (15.5  $\mu\text{L}$ ),  $d_5$ -pyridine (3.75  $\mu\text{L}$ ), 1 (10 mg) in  $d_4$ -MeOH (3 ml) collected using: A) a  $\pi/2$  pulse and a PTF of 0.5 G and B) INEPTnd sequence using a total refocusing time of  $1/2J$  ( $J_{\text{HC}} = 135$  Hz) and a PTF of 80 G. Traces collected using 8 scans.

## 9. $^1\text{H}$ NMR spectra of hyperpolarized C as a function of PTF

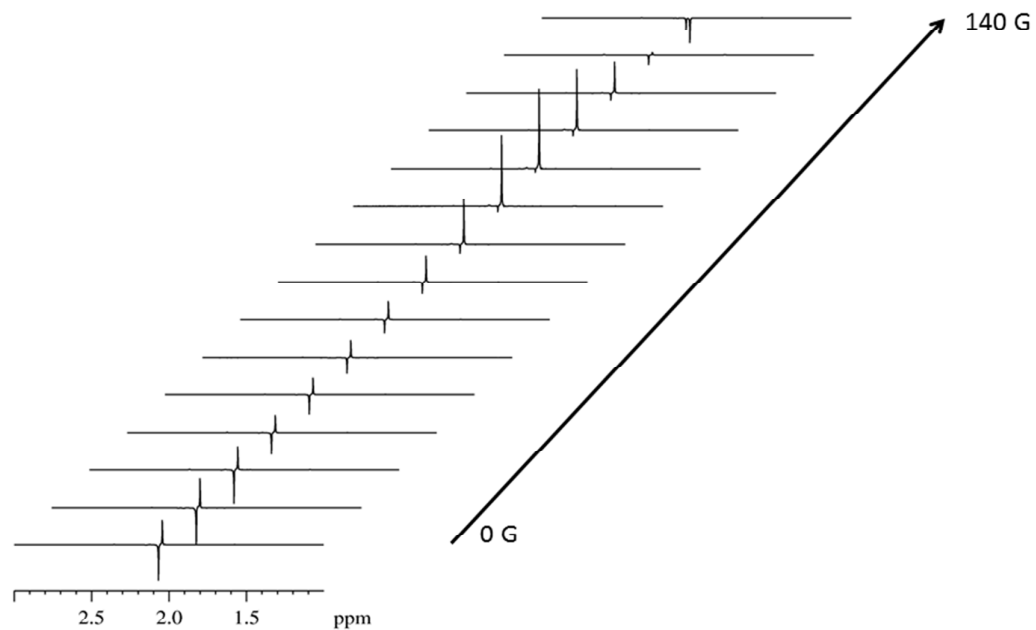

Figure 9:  $^1\text{H}$  field plot for a sample consisting of C (15.5  $\mu\text{L}$ ),  $d_5$ -pyridine (3.75  $\mu\text{L}$ ), 1 (10 mg) in  $d_4$ -MeOH (3 ml). Traces are displayed at PTFs in 10 G steps.

## 10. $^{13}\text{C}$ NMR measurement of C

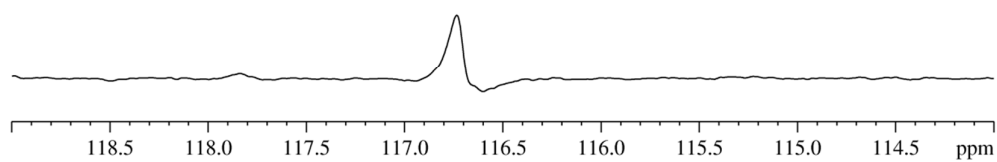

Figure 10:  $^{13}\text{C}\{^1\text{H}\}$  NMR spectrum of a sample consisting of C (15.5  $\mu\text{L}$ ),  $d_5$ -pyridine (3.75  $\mu\text{L}$ ), 1 (10 mg) in  $d_4$ -MeOH (3 ml) after polarization transfer at a PTF of 0.5 G. Trace collected using 8 scans.

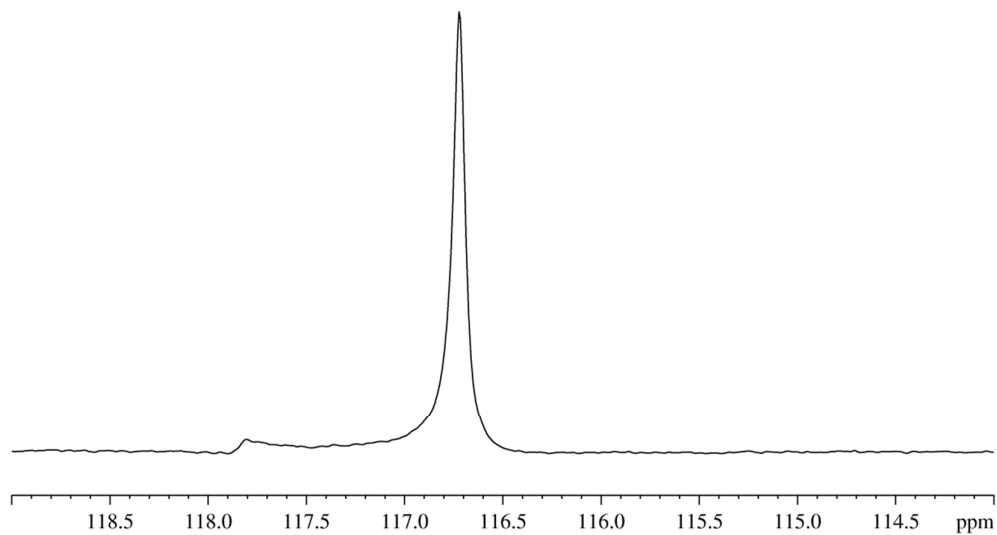

Figure 11: Refocused  $^{13}\text{C}\{^1\text{H}\}$  NMR spectrum ( $J = 20$  Hz (0.025 s)) of a sample consisting of C (15.5  $\mu\text{L}$ ),  $d_5$ -pyridine (3.75  $\mu\text{L}$ ), 1 (10 mg) in  $d_4$ -MeOH (3 ml) after polarization transfer at a PTF of 0.5 G. Trace collected using 8 scans.

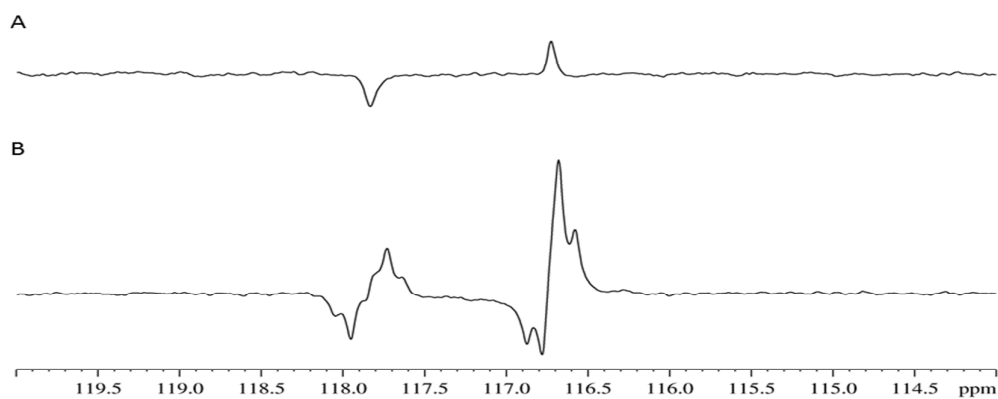

Figure 12:  $^{13}\text{C}$  INEPTrd (A) and INEPTnd (B) NMR traces of a sample consisting of C (15.5  $\mu\text{L}$ ),  $d_5$ -pyridine (3.75  $\mu\text{L}$ ), 1 (10 mg) in  $d_4$ -MeOH (3 ml) after polarization transfer at a PTF of 80 G. Traces collected using 8 scans and a value of  $J=20\text{Hz}$  used for the refocusing time of  $1/2J$ . INEPTrd is an INEPT sequence using refocusing and decoupling during acquisition whereas INEPTnd is an INEPT in which decoupling is not employed.



## **11. Heteronuclear only *parahydrogen* spectroscopy (OPSY)**

The homonuclear OPSY<sup>6,7</sup> sequence was converted into a heteronuclear experiment by replacing each proton pulse with simultaneous pulses to proton and carbon. Coherence selection was then achieved by tuning the gradient ratios according to the respective magnetogyric ratios of proton and carbon in an analogous way to that undertaken in traditional HMQC and HSQC<sup>8</sup> experiments. In this way, heteronuclear two- and three-spin order terms can be differentiated and observed as desired in a comparable manner to the homonuclear terms described in the indicated references.<sup>6,7,9</sup> More than one solution exists for each pair of gradient ratios depending upon the magnitude and sign of the initial gradient. In our experiment we used the values stated in the main text. Thermal equilibrium control experiments were undertaken to establish the fact that no thermal terms were detectable under these conditions.

## 12. Heteronuclear OPSY sequence used for exciting $^1\text{H}$ and $^{13}\text{C}$ spins simultaneously

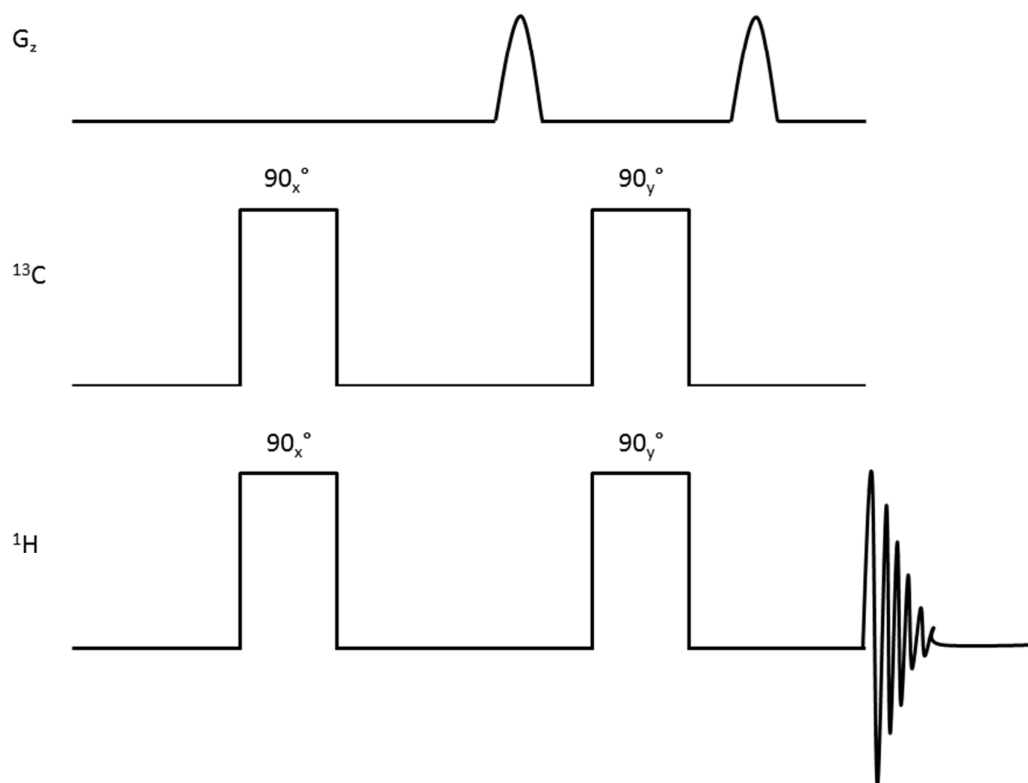

Figure 13 : Schematic of the heteronuclear OPSY pulse sequence for selecting the DQ coherence order that exists between  $^1\text{H}$  and  $^{13}\text{C}$ . The gradient ratios used are 64 : 80 when detecting on  $^1\text{H}$  or 16 : 80 when detecting on  $^{13}\text{C}$ . Although the figure is shown with acquisition occurring on the  $^1\text{H}$  channel, acquisition can actually be undertaken on either the  $^1\text{H}$  or  $^{13}\text{C}$  channel.

**13.  $^1\text{H}$  NMR spectrum of C acquired using the sequence detailed in sFigure 13**

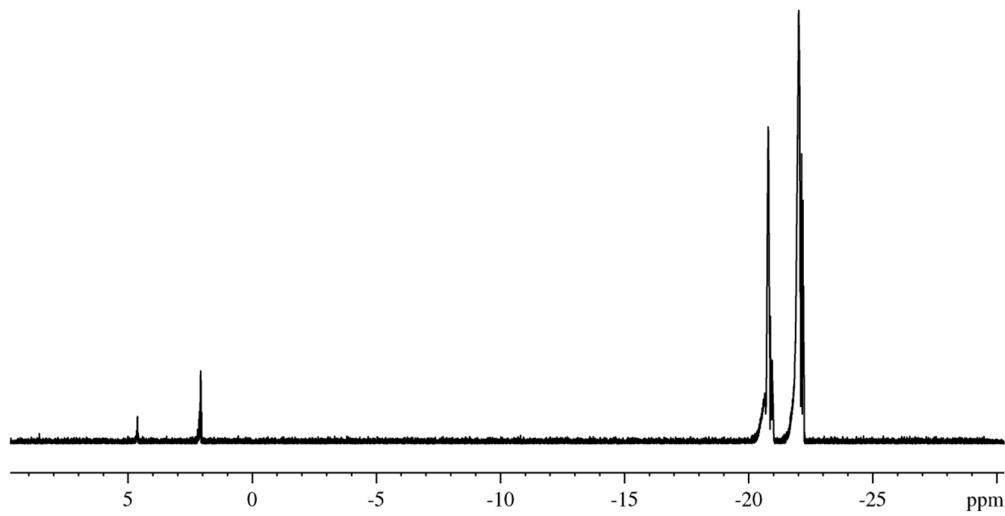

Figure 14 :  $^1\text{H}$  NMR trace of C polarized by 1 at a PTF of 80 G. Gradient ratios used were 45.7:80 % to select the TQ coherence.

The corresponding  $^1\text{H}$  and  $^{13}\text{C}$  DQ traces are shown in Figure 4 in the main paper.

## 14. Hyperpolarization of propionitrile using 1

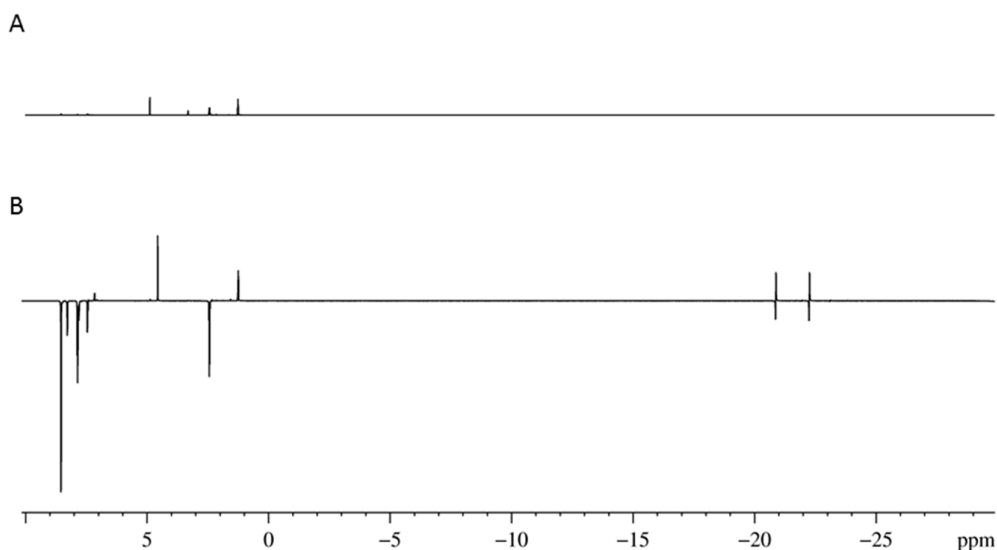

Figure 15: <sup>1</sup>H NMR spectra of a sample containing 0.75 μl pyridine, 4.6 μl propionitrile and 1 (2 mg) in d<sub>4</sub>-MeOH A) at thermal equilibrium and B) after being shaken in a PTF of 65 G

At a PTF of 65 G, the CH<sub>2</sub> protons of propionitrile (δ 2.43 ppm) are enhanced 10-fold whilst the methyl protons (δ 1.25 ppm) are enhanced only 3-fold.

The observed signals for pyridine can be removed by employing d<sub>5</sub>-pyridine as discussed in the main text.

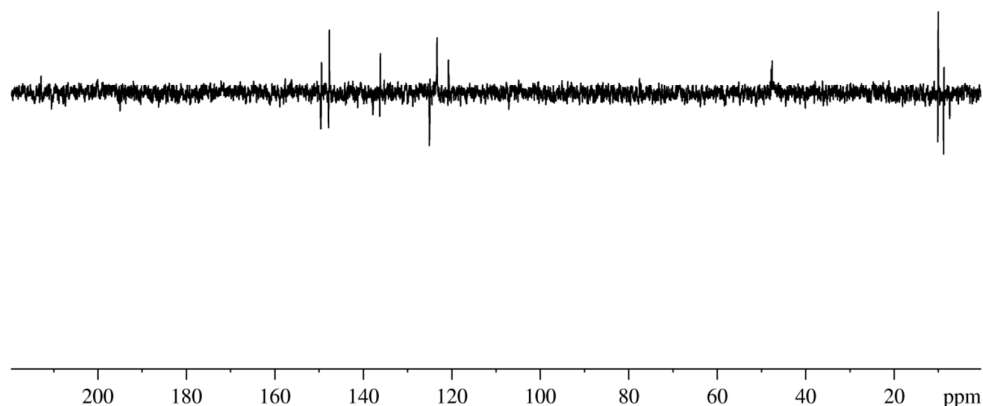

Figure 16: <sup>13</sup>C NMR spectrum of a sample containing 0.75 μl pyridine, 4.6 μl propionitrile and 1 (2 mg) in d<sub>4</sub>-MeOH after being shaken in a PTF of 0.5 G

Note the multiplet structure at ~9.4 ppm; this is due to polarization transfer to the CH<sub>3</sub> carbon resonances. The quaternary carbon of the nitrile group is detected at δ 120 ppm. The other peaks in the region of δ 120 – 160 ppm belong to the carbon nuclei of pyridine.

## 15. Hyperpolarization of *trans*-3-hexenedinitrile using 1

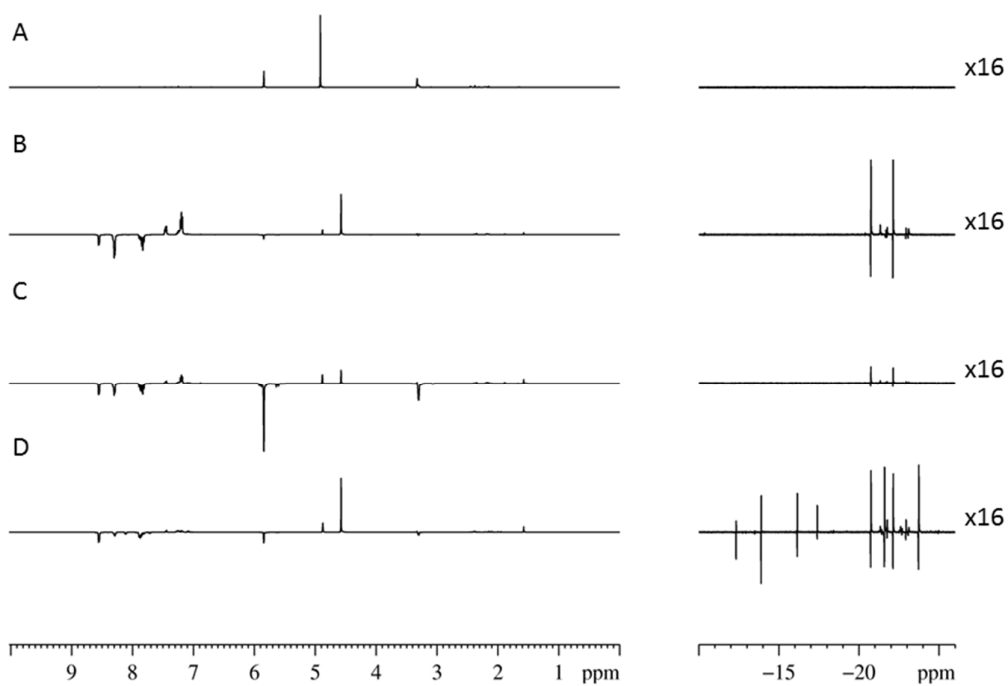

Figure 17: <sup>1</sup>H NMR spectra of a sample containing 0.75  $\mu$ l pyridine, 6.5 mg *trans*-3-hexenedinitrile and 1 (2 mg) in *d*<sub>4</sub>-MeOH: A) at thermal equilibrium, B) after being shaken in a PTF of 2 G, C) after being shaken in a PTF of 65 G and D) showing the initial complexity of the hydride region immediately after introduction of *parahydrogen* in a PTF of 65 G

After shaking in a PTF of 65 G, the CH<sub>2</sub> and alkenic protons are enhanced by 4- and 10-fold respectively, relative to the thermal trace.

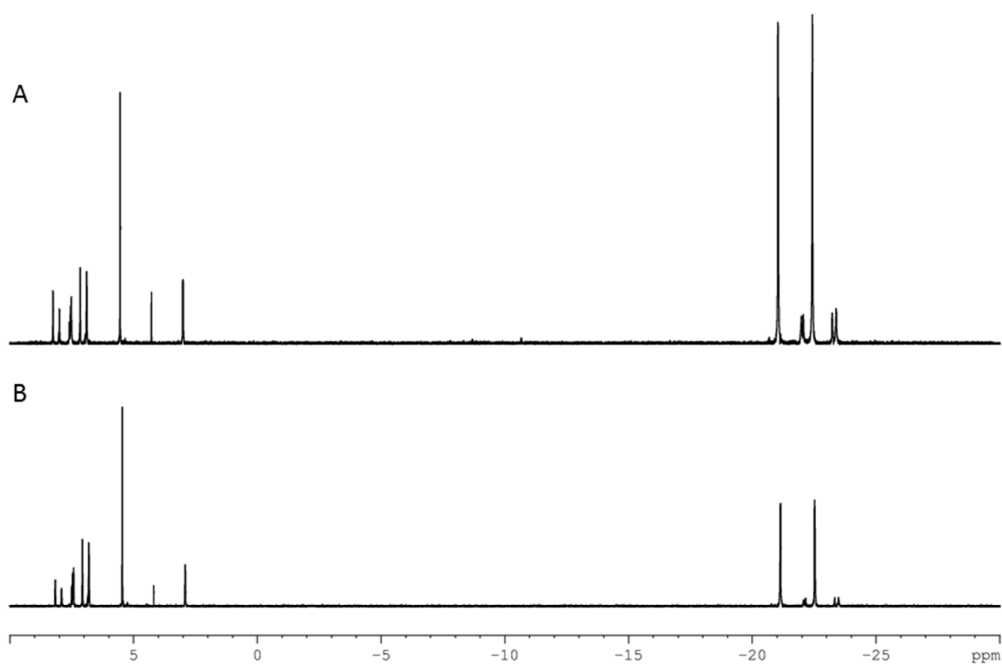

Figure 18:  $^1\text{H}$  OPSY- $dq$  NMR spectra of a sample containing 0.75  $\mu\text{l}$  pyridine, 6.5 mg *trans*-3-hexenedinitrile and 1 (2 mg) in  $d_4$ -MeOH after shaking in a PTF of either 2 G (A) or 65 G(B).

## 16. Hyperpolarization of benzylcyanide using 1

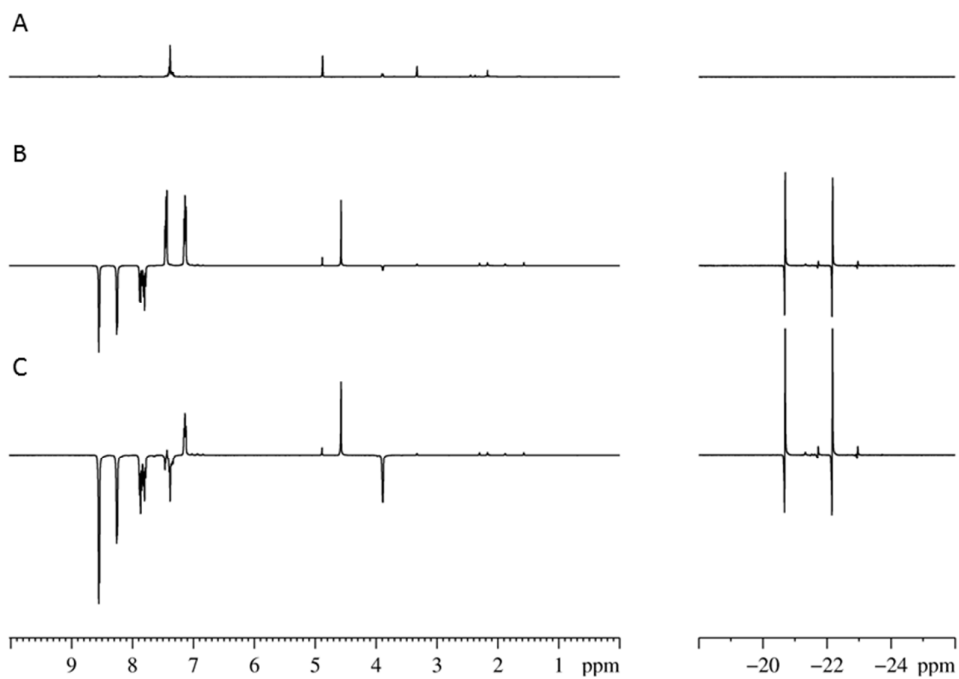

Figure 19:  $^1\text{H}$  NMR spectra of a sample containing 0.75  $\mu\text{l}$  pyridine, 7.5  $\mu\text{l}$  benzylcyanide and 1 (2 mg) in  $d_4$ -MeOH: A) at thermal equilibrium, B) after being shaken in a PTF of 2 G and C) after being shaken in a PTF of 65 G.

The benzyl protons are enhanced 2-fold at a PTF of 65 G whilst the  $\text{CH}_2$  protons are enhanced by 18-fold.

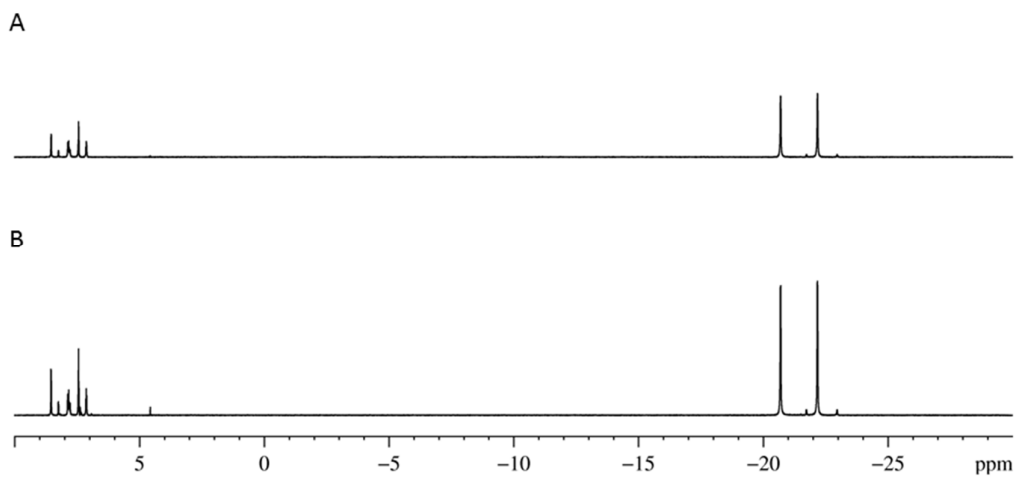

Figure 20:  $^1\text{H}$  OPSY- $dq$  NMR spectra of a sample containing 0.75  $\mu\text{l}$  pyridine, 7.5  $\mu\text{l}$  benzylcyanide and 1 (2 mg) in  $d_4$ -MeOH after shaking in a PTF of either 2 G (A) or 65 G (B).

## 17. Hyperpolarization of benzonitrile using 1

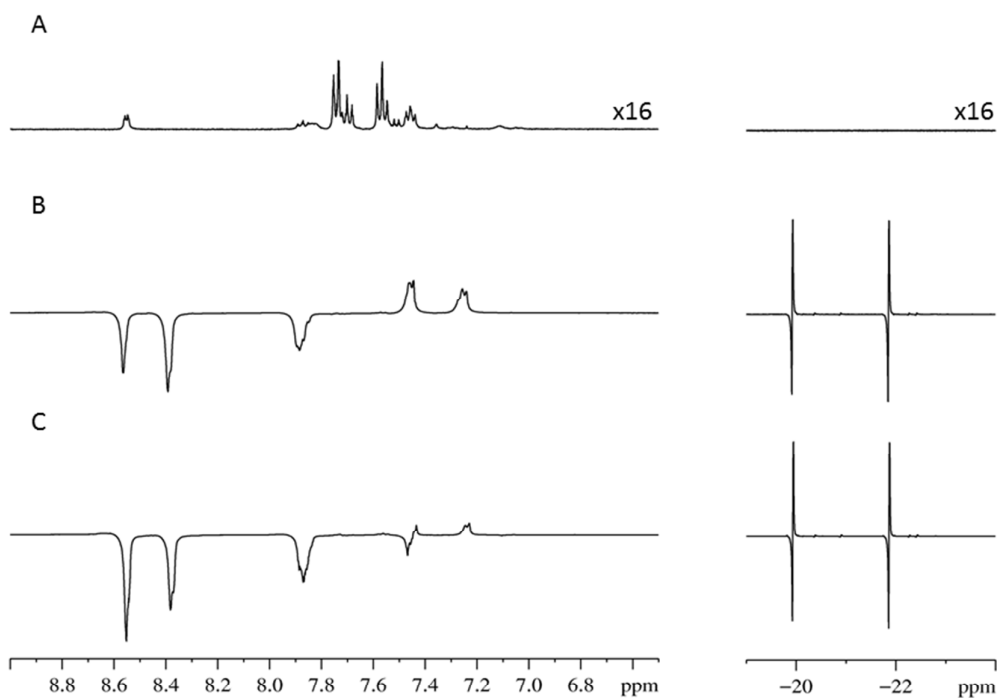

Figure 21:  $^1\text{H}$  NMR spectra of a sample containing 0.75  $\mu\text{l}$  pyridine, 6.1  $\mu\text{l}$  benzonitrile and 1 (2 mg) in  $d_4$ -MeOH: A) at thermal equilibrium (shown with 16-fold vertical expansion relative to B and C, B) after being shaken in a PTF of 2 G and C) after being shaken in a PTF of 65 G.

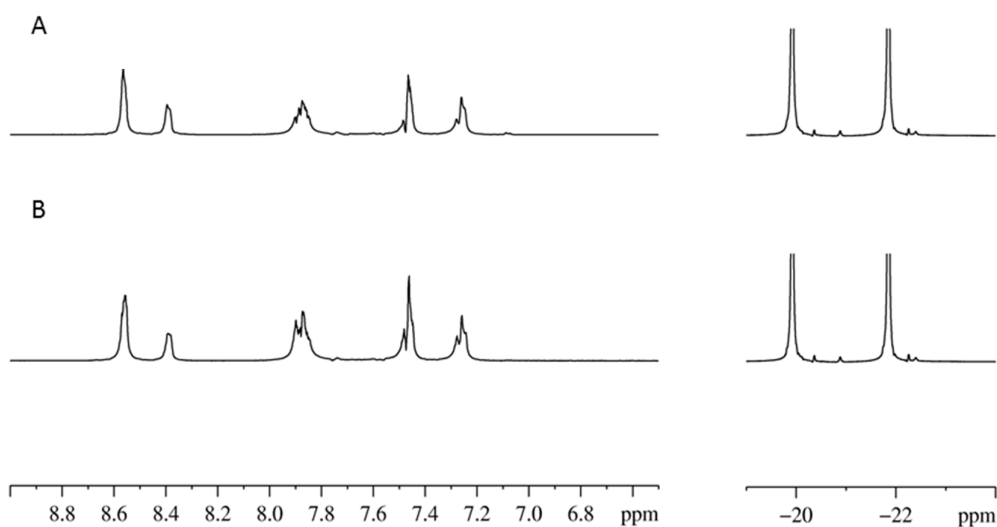

Figure 22:  $^1\text{H}$  OPSY- $dq$  NMR spectra of a sample containing 0.75  $\mu\text{l}$  pyridine, 6.1  $\mu\text{l}$  benzonitrile and 1 (2 mg) in  $d_4$ -MeOH after shaking in a PTF of either 2 G (A) or 65 G (B).



## 18. Couplings and chemical shifts used to produce the theoretical spectra

The following spectral parameters were used in the theoretical models to produce the reported  $^1\text{H}$  and  $^{13}\text{C}$  NMR spectra. The parameters produce a close match with experiment as discussed in the main paper.

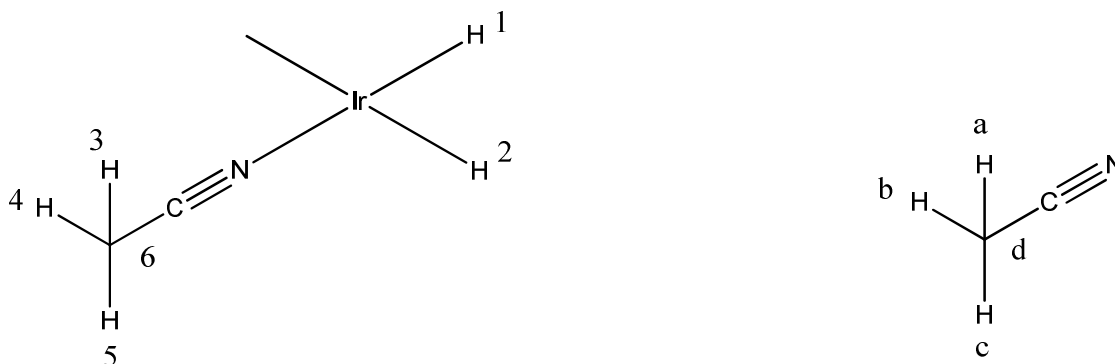

Table 5: NMR data used in calculations

|                                   | $^1\text{H}$ | Quaternary $^{13}\text{C}$ | Methyl $^{13}\text{C}$ |
|-----------------------------------|--------------|----------------------------|------------------------|
| $\nu_1$                           | -20.56       | -20.56                     | -20.56                 |
| $\nu_2$                           | -22.12       | -22.12                     | -22.12                 |
| $\nu_3$                           | 2.16         | 2.16                       | 2.16                   |
| $\nu_4$                           | 2.16         | 2.16                       | 2.16                   |
| $\nu_5$                           | 2.16         | 2.16                       | 2.16                   |
| $\nu_6$                           | N/A          | 117.8*                     | 21.94*                 |
| $\nu_a$                           | 2.05         | 2.05                       | 2.05                   |
| $\nu_b$                           | 2.05         | 2.05                       | 2.05                   |
| $\nu_c$                           | 2.05         | 2.05                       | 2.05                   |
| $\nu_d$                           | N/A          | 116.7*                     | 1.09*                  |
| $J_{12}$                          | -7.56        | -7.56                      | -7.56                  |
| $J_{13}$                          | -2.1         | -2.1                       | -2.1                   |
| $J_{14}$                          | -2.1         | -2.1                       | -2.1                   |
| $J_{15}$                          | -2.1         | -2.1                       | -2.1                   |
| $J_{16}$                          | N/A          | -2.0                       | -4.0                   |
| $J_{23}$                          | -0.5         | -0.2                       | -0.5                   |
| $J_{24}$                          | -0.5         | -0.2                       | -0.5                   |
| $J_{25}$                          | -0.5         | -0.2                       | -0.5                   |
| $J_{26}$                          | N/A          | -0.2                       | -0.2                   |
| $J_{34}(J_{ab})$                  | 0            | 0                          | 0                      |
| $J_{35}(J_{ac})$                  | 0            | 0                          | 0                      |
| $J_{36}$                          | N/A          | -9.2                       | 136                    |
| $J_{45}(J_{bd})$                  | 0            | 0                          | 0                      |
| $J_{46}$                          | N/A          | -9.2                       | 136                    |
| $J_{56}$                          | N/A          | -9.2                       | 136                    |
| Exchange rate ( $\text{s}^{-1}$ ) | 10.4         | 10.4                       | 10.4                   |
| Residence time (s)                | 0.096        | 0.096                      | 0.096                  |

\* The corresponding nucleus is either the  $^{13}\text{C}$  methyl or quaternary nucleus- this is dependent on the nucleus of interest

## 19. DFT general considerations

For all structures, the system modelled was the same as the real system i.e. methyl groups on the phenyl rings were modelled as methyl groups rather than hydrogen atoms. The structures were optimised using the PBE0 functional from Adamo<sup>10</sup> and the basis sets from Aldrich described by the def2-SVP label.<sup>11, 12</sup> This basis set family included the ECP for iridium from Andrae.<sup>13</sup> Optimisations were performed in Turbomole 6.4<sup>14</sup> using the RI<sup>15, 16</sup> approximation and associated auxiliary basis sets.<sup>17</sup> Local minima were confirmed by the calculation of analytical second derivatives. Counterpoise corrections<sup>18, 19</sup> were undertaken on the optimised geometries using Gaussian 09C<sup>20</sup> and the same functional and basis set family. Single point energies incorporating the PCM model<sup>21-23</sup> and the SMD model<sup>24</sup> ( $\epsilon=32.613$  for methanol) were subsequently performed in Gaussian 09 using the same basis set family and functional. The thermodynamic corrections calculated in Turbomole were combined with solvation energies to calculate the thermodynamic values given. This approach has been used in the literature previously by Fomine.<sup>25</sup> Additionally, the correction proposed by Sakaki *et. al.* was used<sup>26-28</sup> to correct entropy terms. This results in modified free energy values that lie closer to the true values. The PBE0 functional was chosen due to its success in modelling metal complexes<sup>29</sup>, ruthenium-phosphine complexes<sup>30</sup> and second generation ruthenium alkylidene catalysts.<sup>25</sup>

For the vibrational analysis of  $\text{Ir}(\text{IMes})(\text{CO})_2\text{Cl}$ , a scaling factor of 0.9512<sup>31</sup> taken from the literature was applied to all calculated carbonyl stretch frequencies.

## 20. DFT calculations for complexes **2** and **3**

Density functional theory was used to model the energies and reactions of **2** and **3** (sFigure 23). Complex **3** was found to be 31.8 kJ mol<sup>-1</sup> ( $E_{\text{SCF+ZPE}}$ ) more stable than **2**; the enthalpy difference was 25.1 kJ mol<sup>-1</sup>. These calculations were carried out in the gas phase and so single point energy calculations were undertaken with both the PCM and SMD solvation models to investigate the effect of the methanol solvent. Both calculations revealed the more stable complex to be **3**, with the enthalpy difference rising slightly to 26.5 kJ mol<sup>-1</sup> for PCM solvation and reducing to 20.0 kJ mol<sup>-1</sup> for SMD solvation.

Complex [Ir(H)<sub>2</sub>(IMes)(MeCN)<sub>2</sub>(py)]Cl (**2B**) was also modelled. This complex can undergo loss of either an acetonitrile ligand *trans* to hydride or a pyridine ligand *trans* to IMes. Loss of **A** proved to be favoured. The resulting 16e<sup>-</sup> product [Ir(H)<sub>2</sub>(IMes)(MeCN)(py)]<sup>+</sup> (**2B-A**) is more stable than [Ir(H)<sub>2</sub>(IMes)(MeCN)<sub>2</sub>]<sup>+</sup> (**2-A**), which is the corresponding product formed by the loss of **A** from **2**. In contrast, **3** can also undergo ligand loss of either **A** or pyridine in the equatorial plane. The loss of **A** is again favoured. The corresponding bond energies are 67.7 and 75.8 kJ mol<sup>-1</sup> respectively.

Table 6: Computed zero point corrected SCF energy, enthalpy, Gibbs free energies for **A** and pyridine loss in **2**, **2B** and **3**

| Complex                          | [Ir(H) <sub>2</sub> (IMes)(MeCN) <sub>2</sub> ] <sup>+</sup><br>( <b>2-A</b> ) / kJ mol <sup>-1</sup> | [Ir(H) <sub>2</sub> (IMes)(MeCN)(py)] <sup>+</sup><br>( <b>2B-A</b> ) / kJ mol <sup>-1</sup> | [Ir(H) <sub>2</sub> (IMes)(MeCN)(Py)] <sup>+</sup><br>( <b>3-A</b> ) / kJ mol <sup>-1</sup> | [Ir(H) <sub>2</sub> (IMes)(MeCN) <sub>2</sub> ] <sup>+</sup><br>( <b>3-Py</b> ) / kJ mol <sup>-1</sup> |
|----------------------------------|-------------------------------------------------------------------------------------------------------|----------------------------------------------------------------------------------------------|---------------------------------------------------------------------------------------------|--------------------------------------------------------------------------------------------------------|
| Gas phase - $E_{\text{SCF+ZPE}}$ | 62.9                                                                                                  | 62.5                                                                                         | 69.2                                                                                        | 74.9                                                                                                   |
| $\Delta H$                       | 70.8                                                                                                  | 64.1                                                                                         | 67.7                                                                                        | 75.8                                                                                                   |
| $\Delta G$                       | 58.6                                                                                                  | 77.8                                                                                         | 96.8                                                                                        | 95.2                                                                                                   |
| PCM - $E_{\text{SCF+ZPE}}$       | 27.9                                                                                                  | 26.6                                                                                         | 29.4                                                                                        | 39.3                                                                                                   |
| $\Delta H$                       | 35.9                                                                                                  | 28.2                                                                                         | 28.0                                                                                        | 40.3                                                                                                   |
| $\Delta G$                       | 23.7                                                                                                  | 41.9                                                                                         | 57.0                                                                                        | 59.7                                                                                                   |
| SMD - $E_{\text{SCF+ZPE}}$       | 3.4                                                                                                   | -1.5                                                                                         | 5.8                                                                                         | 8.0                                                                                                    |
| $\Delta H$                       | 11.3                                                                                                  | 0.1                                                                                          | 4.3                                                                                         | 9.0                                                                                                    |
| $\Delta G$                       | -0.8                                                                                                  | 13.8                                                                                         | 33.3                                                                                        | 28.4                                                                                                   |

Experimentally, **2** is stable in methanol in solution. The SMD model erroneously predicts that the formation of [Ir(H)<sub>2</sub>(IMes)(MeCN)<sub>2</sub>(MeOH)]<sup>+</sup> via the loss of **A** has a  $\Delta G_{\text{corrected}}$  of -0.8 kJ mol<sup>-1</sup> whereas  $\Delta G_{\text{uncorrected}}$  is -67.6 kJ mol<sup>-1</sup>. As the true value lies between these two values, the values given by the SMD model can be discounted and are not used in our studies.

The enthalpies of these complexes are also illustrated in sFigure 23, where all enthalpies are relative to that of **2**.

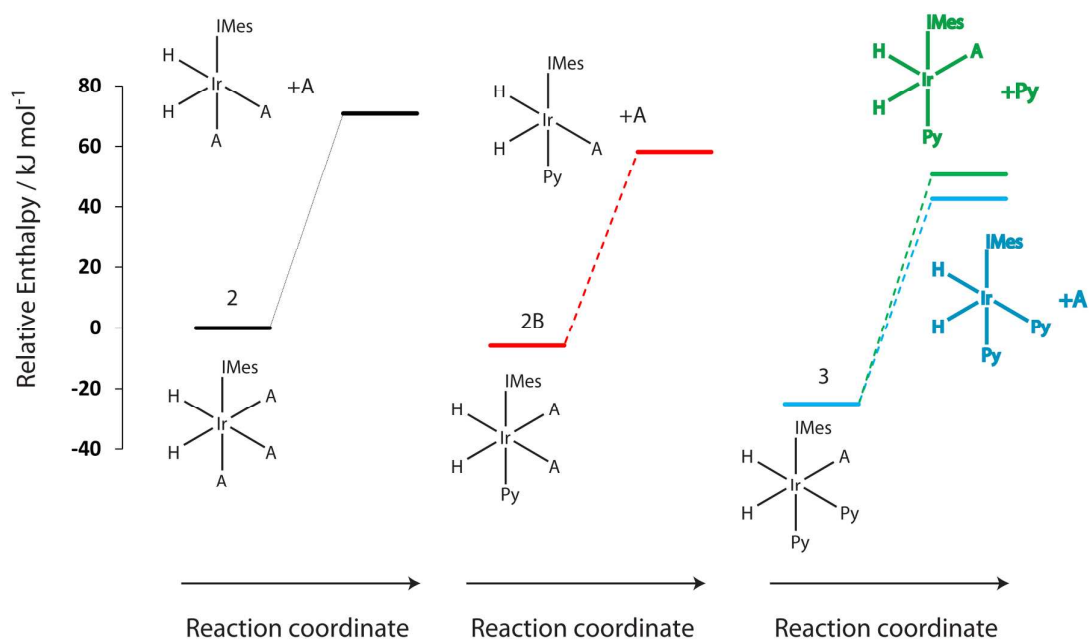

Figure 23: Relative potential energy profiles for the loss of A or Py from 2, 2B or 3

The results from our DFT calculations are consistent with the observed increase in polarization of A in 3 over 2.

## 21. DFT calculations for the binding modes of *cis*- and *trans*-3-hexenedinitrile

The coordination of *trans*-3-hexenedinitrile to **3** was modelled theoretically and the coordination through the nitrile group was calculated to be  $-105.9 \text{ kJ mol}^{-1}$  (in terms of relative enthalpy) more stable than the coordination through the alkene group. To examine any steric effects, the coordination of the *cis* isomer was also modelled. The nitrile bound *cis*-3-hexenedinitrile was again found to be more stable than via coordination through the alkene, with a difference in enthalpy of  $-81.3 \text{ kJ mol}^{-1}$ . The *cis* isomer was also found to coordinate more weakly through the nitrile group compared to the *trans* isomer by  $+14.3 \text{ kJ mol}^{-1}$ , which arises from the steric crowding of the *cis* isomer relative to the *trans* isomer following ligation to the metal centre. These enthalpies are illustrated in sFigure 24.

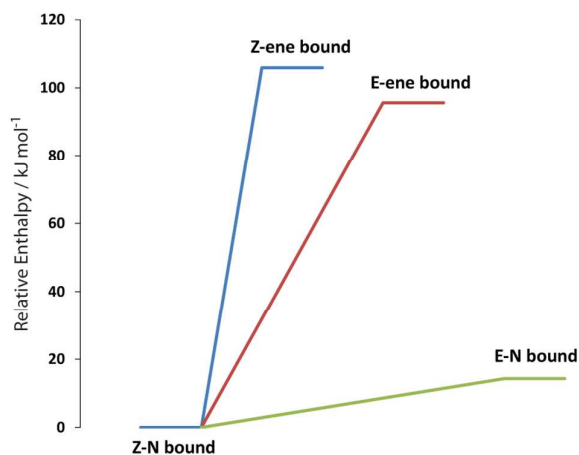

sFigure 24: Relative enthalpies for the coordination of *cis*-3-hexenedinitrile and *trans*-3-hexenedinitrile to **3** via either the alkene (ene) or nitrile (N) group. E and Z refer to the *cis*- and *trans*-configurations of the alkene bond respectively.

## 22. DFT vibrational calculations for Ir(NHC)(CO)<sub>2</sub>Cl where NHC= IMes-*d*<sub>22</sub> or IMes

The structures of Ir(CO)<sub>2</sub>(IMes)Cl and Ir(IMes-*d*<sub>22</sub>)(CO)<sub>2</sub>Cl were optimised and analytical second derivatives calculated in order to obtain the vibrational frequencies of the complexes. Calculated values for Ir(CO)<sub>2</sub>(IMes)Cl were found to be 2090.2 and 1997.1 cm<sup>-1</sup> whilst for Ir(CO)<sub>2</sub>(IMes-*d*<sub>22</sub>)Cl they were 2090.4 and 1996.9 cm<sup>-1</sup>. The difference between the two CO frequencies in these complexes is small (0.2 cm<sup>-1</sup>). Thus, a negligible difference in the resulting electron-donating ability of IMes and IMes-*d*<sub>22</sub> is predicted. Experimental rate data for ligand loss in [Ir(H)<sub>2</sub>(IMes)(MeCN)<sub>2</sub>(py)]<sup>+</sup> and [Ir(H)<sub>2</sub>(IMes-*d*<sub>22</sub>)(MeCN)<sub>2</sub>(py)]<sup>+</sup> agree with this.

### 23. Cartesian Coordinates, total electronic energy and zero point energies obtained from DFT calculations

[Ir(H)<sub>2</sub>(IMes)(MeCN)<sub>3</sub>]Cl (2)

SCF-energy: -1425.4289763

SCF + E(vib0): -1424.8676191

|    |              |              |              |
|----|--------------|--------------|--------------|
| Ir | -0.045313802 | 0.921960036  | -0.444779505 |
| H  | -1.330032055 | 0.606218773  | -1.283073908 |
| H  | 0.756645561  | 0.540559180  | -1.742257422 |
| C  | -0.739574176 | -3.196151636 | 0.175437250  |
| C  | 0.612130694  | -3.212473669 | 0.179223894  |
| H  | -1.468292396 | -3.997690938 | 0.258025239  |
| H  | 1.322060894  | -4.030016508 | 0.267916726  |
| C  | -0.036850819 | -1.049890424 | -0.066069806 |
| N  | -1.122268897 | -1.875471799 | 0.027631292  |
| N  | 1.026898969  | -1.900005510 | 0.034162450  |
| C  | -2.505912094 | -1.501365768 | 0.005923737  |
| C  | -3.169823883 | -1.320256378 | 1.228515210  |
| C  | -3.179240713 | -1.434855617 | -1.223694331 |
| C  | -4.530289948 | -1.003487707 | 1.193561037  |
| C  | -4.538822984 | -1.114581830 | -1.202468979 |
| C  | -5.231545314 | -0.884604181 | -0.010321496 |
| H  | -5.064315841 | -0.870136374 | 2.139422337  |
| H  | -5.077382794 | -1.059103279 | -2.152695123 |
| C  | 2.420557799  | -1.566717036 | 0.040348199  |
| C  | 3.128450143  | -1.540874422 | -1.171532504 |
| C  | 3.054738674  | -1.388645489 | 1.277937195  |
| C  | 4.500507085  | -1.285566720 | -1.115944159 |
| C  | 4.433063127  | -1.153310302 | 1.278910019  |
| C  | 5.173609015  | -1.091560100 | 0.094812402  |
| H  | 5.065813313  | -1.262748718 | -2.052086267 |
| H  | 4.946121182  | -1.038420666 | 2.239014050  |
| C  | -2.458578301 | -1.515689966 | 2.537170018  |
| H  | -1.483946057 | -1.006502293 | 2.557176183  |
| H  | -3.066634007 | -1.146310975 | 3.374918326  |
| H  | -2.264546773 | -2.583952356 | 2.729253300  |
| C  | -2.473260091 | -1.717606759 | -2.516381438 |
| H  | -3.177519697 | -1.703265182 | -3.358494029 |
| H  | -1.687892731 | -0.970024406 | -2.709066823 |
| H  | -1.983522374 | -2.704116740 | -2.501370949 |
| C  | -6.687632618 | -0.519622800 | -0.023072366 |
| H  | -6.818289518 | 0.574626097  | -0.067017637 |
| H  | -7.201743201 | -0.941962565 | -0.897915301 |

|   |              |              |              |
|---|--------------|--------------|--------------|
| H | -7.202221704 | -0.874307249 | 0.881382894  |
| C | 2.280004115  | -1.451351612 | 2.562391341  |
| H | 2.930644836  | -1.256246035 | 3.425440137  |
| H | 1.463096066  | -0.711786115 | 2.570756083  |
| H | 1.817636589  | -2.440221227 | 2.711452444  |
| C | 2.445673980  | -1.805730291 | -2.480196181 |
| H | 1.676361345  | -1.045782167 | -2.686110876 |
| H | 3.167277990  | -1.800536634 | -3.307601815 |
| H | 1.939668366  | -2.784169087 | -2.478991853 |
| C | 6.653792468  | -0.839248002 | 0.113302813  |
| H | 7.195687365  | -1.610914238 | -0.454443499 |
| H | 6.899666459  | 0.128630501  | -0.353264666 |
| H | 7.053465349  | -0.831824328 | 1.136850042  |
| C | 3.980206827  | 2.480087271  | 1.529075828  |
| H | 4.554691025  | 2.951112772  | 0.718298467  |
| H | 3.774676500  | 3.230928207  | 2.305355674  |
| H | 4.581799394  | 1.666640089  | 1.959482043  |
| C | 2.742154287  | 1.939436538  | 1.006257109  |
| N | 1.762756283  | 1.499421423  | 0.581451711  |
| C | -2.906858102 | 2.354158501  | 3.054090744  |
| H | -2.908204196 | 1.662227021  | 3.908709911  |
| H | -2.625377885 | 3.355721590  | 3.409539097  |
| H | -3.920698516 | 2.395729528  | 2.629812105  |
| C | -1.973378248 | 1.895184287  | 2.045641703  |
| N | -1.246073623 | 1.515024854  | 1.233346350  |
| C | -0.333620971 | 5.181717714  | -2.272771373 |
| H | 0.503867738  | 5.329735179  | -2.970056846 |
| H | -1.276629392 | 5.242436628  | -2.835533925 |
| H | -0.316361866 | 5.983654529  | -1.520596445 |
| C | -0.223726748 | 3.886225058  | -1.634103652 |
| N | -0.142279993 | 2.844151354  | -1.145214361 |

[Ir(H)<sub>2</sub>(IMes)(MeCN)<sub>2</sub>]Cl (**2-A**)

SCF-energy: -1292.9058820

SCF + E(vib0): -1292.3932215

|    |              |              |              |
|----|--------------|--------------|--------------|
| Ir | 0.230262251  | -0.634607264 | 0.576293254  |
| H  | 0.203187495  | -0.250492581 | 2.105235110  |
| H  | 1.747529695  | -0.614953203 | 0.760595043  |
| C  | -0.466112127 | 3.425523128  | -0.115385004 |
| C  | 0.881937524  | 3.490265208  | 0.014215050  |
| H  | -1.208165509 | 4.200047757  | -0.289308891 |
| H  | 1.564985219  | 4.334466240  | -0.024417953 |



|   |              |              |              |
|---|--------------|--------------|--------------|
| C | 0.290733875  | 1.325264761  | 0.240525628  |
| N | -0.808985175 | 2.092792756  | 0.025623440  |
| N | 1.330521867  | 2.197555087  | 0.232204930  |
| C | -2.135882808 | 1.555011122  | -0.033271908 |
| C | -2.681794948 | 1.233644615  | -1.286598361 |
| C | -2.863521935 | 1.401695349  | 1.161113602  |
| C | -3.976665281 | 0.709408363  | -1.318637705 |
| C | -4.152989067 | 0.874295199  | 1.069771857  |
| C | -4.726274737 | 0.515751043  | -0.155207523 |
| H | -4.418130343 | 0.457186944  | -2.286977602 |
| H | -4.734189742 | 0.753156769  | 1.988325743  |
| C | 2.709347657  | 1.859469982  | 0.435855412  |
| C | 3.225116698  | 1.876385080  | 1.740245877  |
| C | 3.506383592  | 1.565292226  | -0.680627651 |
| C | 4.578298882  | 1.571424851  | 1.905430471  |
| C | 4.851698244  | 1.266735757  | -0.459302595 |
| C | 5.407406043  | 1.261231758  | 0.824002310  |
| H | 4.998391390  | 1.583816150  | 2.915048120  |
| H | 5.488114707  | 1.038264437  | -1.319005208 |
| C | -1.921749625 | 1.487016158  | -2.556014342 |
| H | -0.888274469 | 1.116051376  | -2.495606690 |
| H | -2.417357690 | 1.007992953  | -3.411244545 |
| H | -1.860435445 | 2.565608490  | -2.774662338 |
| C | -2.291768350 | 1.821889983  | 2.483694355  |
| H | -3.022057084 | 1.672204975  | 3.289433959  |
| H | -1.386148281 | 1.247228050  | 2.731170848  |
| H | -2.008292405 | 2.886264529  | 2.478214470  |
| C | -6.109321976 | -0.063783136 | -0.211288331 |
| H | -6.106249070 | -1.117574047 | 0.112668419  |
| H | -6.796763307 | 0.475888957  | 0.456602992  |
| H | -6.523522767 | -0.030683782 | -1.228429536 |
| C | 2.935219298  | 1.583466459  | -2.068467764 |
| H | 3.682184413  | 1.253693247  | -2.802712214 |
| H | 2.056535002  | 0.924367263  | -2.146825865 |
| H | 2.605847964  | 2.594187787  | -2.358729788 |
| C | 2.356443456  | 2.206077540  | 2.917894564  |
| H | 1.570946602  | 1.445201281  | 3.052429365  |
| H | 2.948652108  | 2.250453349  | 3.841104501  |
| H | 1.849898055  | 3.176157817  | 2.794031173  |
| C | 6.851471228  | 0.911180325  | 1.034659592  |
| H | 7.247788977  | 1.364420803  | 1.954030617  |
| H | 6.978992510  | -0.180467206 | 1.125849146  |
| H | 7.474823649  | 1.241812609  | 0.191498054  |
| C | 0.429449394  | -2.132898989 | -3.915619648 |
| H | 0.856121602  | -3.146371869 | -3.923428648 |

|   |              |              |              |
|---|--------------|--------------|--------------|
| H | -0.572127386 | -2.164320825 | -4.368586991 |
| H | 1.071898589  | -1.472542563 | -4.516270656 |
| C | 0.345594797  | -1.639755646 | -2.556306575 |
| N | 0.284468300  | -1.240685509 | -1.473174279 |
| C | -0.023628188 | -5.038734450 | 2.034204246  |
| H | 0.641022575  | -5.697475827 | 1.456573105  |
| H | 0.285799562  | -5.057112289 | 3.089589568  |
| H | -1.053904514 | -5.416220929 | 1.959308885  |
| C | 0.048549420  | -3.685723582 | 1.525013117  |
| N | 0.110981011  | -2.601146494 | 1.133336025  |

[Ir(H)<sub>2</sub>(IMes)(MeCN)<sub>2</sub>(Py)]Cl (**2B**)

SCF-energy: -1540.7554544

SCF + E(vib0): -1540.1492235

|    |              |              |              |
|----|--------------|--------------|--------------|
| Ir | -0.011022233 | -0.647234629 | 0.202642220  |
| H  | -1.130629548 | -0.507465530 | 1.296460262  |
| H  | 1.017134268  | -0.545562027 | 1.388348092  |
| C  | -0.628044181 | 3.530801169  | 0.392819776  |
| C  | 0.722934181  | 3.513195506  | 0.404248920  |
| H  | -1.337180488 | 4.351054237  | 0.460679704  |
| H  | 1.452170270  | 4.314561582  | 0.483945750  |
| C  | 0.021001452  | 1.358698476  | 0.213738723  |
| N  | -1.043144335 | 2.215704211  | 0.274591646  |
| N  | 1.105522781  | 2.187497455  | 0.292579011  |
| C  | -2.436666473 | 1.888275523  | 0.211457265  |
| C  | -3.085184950 | 1.967794560  | -1.028561724 |
| C  | -3.133489641 | 1.615292227  | 1.399820300  |
| C  | -4.460996552 | 1.716728340  | -1.065127258 |
| C  | -4.502589651 | 1.359688074  | 1.306406238  |
| C  | -5.186839002 | 1.402960713  | 0.087147762  |
| H  | -4.985635636 | 1.795235526  | -2.022731567 |
| H  | -5.056574957 | 1.138687065  | 2.223301275  |
| C  | 2.491350354  | 1.826128646  | 0.250610831  |
| C  | 3.164747797  | 1.542455328  | 1.449544763  |
| C  | 3.158320881  | 1.884412212  | -0.981018180 |
| C  | 4.529996334  | 1.259125087  | 1.376811334  |
| C  | 4.529425314  | 1.607928895  | -0.996627544 |
| C  | 5.232874522  | 1.286785785  | 0.167902930  |
| H  | 5.065988719  | 1.029843618  | 2.302293749  |
| H  | 5.068315538  | 1.670648628  | -1.947443583 |
| C  | -2.336290598 | 2.342471134  | -2.274988192 |
| H  | -1.428596916 | 1.733392116  | -2.402125137 |
| H  | -2.967167406 | 2.220557565  | -3.166368149 |

|   |              |              |              |
|---|--------------|--------------|--------------|
| H | -2.011511713 | 3.395226921  | -2.246513185 |
| C | -2.440287718 | 1.630478243  | 2.729883449  |
| H | -3.146643194 | 1.418488551  | 3.543061248  |
| H | -1.632808121 | 0.882851567  | 2.766133170  |
| H | -1.980471546 | 2.611749058  | 2.929307526  |
| C | -6.666598769 | 1.154966896  | 0.034122370  |
| H | -6.931875208 | 0.205750084  | 0.524766890  |
| H | -7.217297017 | 1.951019456  | 0.560319531  |
| H | -7.038874938 | 1.122000773  | -0.999272604 |
| C | 2.430779392  | 2.255013079  | -2.241096712 |
| H | 3.082610011  | 2.148453625  | -3.119061735 |
| H | 1.538083747  | 1.628468767  | -2.390918052 |
| H | 2.084888758  | 3.300897732  | -2.213662560 |
| C | 2.452804443  | 1.575003978  | 2.769322553  |
| H | 1.630699794  | 0.843216196  | 2.795406959  |
| H | 3.142937085  | 1.351870528  | 3.593397001  |
| H | 2.008935329  | 2.565403391  | 2.959344552  |
| C | 6.709953785  | 1.019341006  | 0.137731661  |
| H | 7.266742646  | 1.844785678  | 0.610018403  |
| H | 6.964307698  | 0.103883177  | 0.693339472  |
| H | 7.085904973  | 0.913965162  | -0.889581924 |
| C | 3.690946165  | -1.664171123 | -2.560031041 |
| H | 4.036449155  | -2.665572607 | -2.265155317 |
| H | 3.470043879  | -1.664745666 | -3.637097146 |
| H | 4.490688794  | -0.937186280 | -2.355076549 |
| C | 2.513864692  | -1.299462692 | -1.799046571 |
| N | 1.591437281  | -0.993110568 | -1.173920634 |
| C | -3.529622385 | -1.465792992 | -2.846867912 |
| H | -3.256533014 | -1.359535666 | -3.906637610 |
| H | -3.881953169 | -2.492312498 | -2.669894308 |
| H | -4.344012984 | -0.764704771 | -2.611116940 |
| C | -2.393847398 | -1.174340774 | -1.996708233 |
| N | -1.506709987 | -0.923866407 | -1.299752935 |
| C | -0.139874972 | -5.529368693 | 0.969899356  |
| C | -0.156128016 | -4.627021961 | 2.030072838  |
| C | -0.116324505 | -3.264986600 | 1.759558433  |
| N | -0.062578549 | -2.777580386 | 0.509315115  |
| C | -0.046681567 | -3.648304993 | -0.510630555 |
| C | -0.083797339 | -5.025381705 | -0.326441412 |
| H | -0.170404240 | -6.606303589 | 1.151100500  |
| H | -0.199532918 | -4.967148638 | 3.066040699  |
| H | -0.127174819 | -2.524329415 | 2.559830748  |
| H | -0.002661111 | -3.215206377 | -1.512072606 |
| H | -0.068924548 | -5.687411516 | -1.194103136 |

[Ir(H)<sub>2</sub>(IMes)(MeCN)(Py)]Cl (**2B-A**)

SCF-energy: -1408.2300922

SCF + E(vib0): -1407.6728807

|    |              |              |              |
|----|--------------|--------------|--------------|
| Ir | -0.302463724 | -0.422487876 | 0.371553344  |
| H  | -1.829806332 | -0.409649211 | 0.443063648  |
| H  | -0.393765945 | -0.268019852 | 1.941162609  |
| C  | -0.844757626 | 3.755908070  | 0.391589392  |
| C  | 0.497327637  | 3.671120089  | 0.220321820  |
| H  | -1.501041906 | 4.616722563  | 0.485367691  |
| H  | 1.259600526  | 4.441034838  | 0.136756451  |
| C  | -0.320014454 | 1.561763794  | 0.302567575  |
| N  | -1.330163466 | 2.458702007  | 0.440779899  |
| N  | 0.799715138  | 2.321810060  | 0.167599214  |
| C  | -2.714415953 | 2.134473757  | 0.624643280  |
| C  | -3.527670017 | 1.971355574  | -0.505144627 |
| C  | -3.215930070 | 2.021164366  | 1.931076004  |
| C  | -4.877848273 | 1.676583758  | -0.299101226 |
| C  | -4.571596354 | 1.725522023  | 2.080924115  |
| C  | -5.420295261 | 1.551255165  | 0.982261106  |
| H  | -5.526584586 | 1.545825362  | -1.169811736 |
| H  | -4.978900839 | 1.632508056  | 3.091828072  |
| C  | 2.103280573  | 1.753175704  | 0.003686640  |
| C  | 2.830734155  | 1.373110999  | 1.146169166  |
| C  | 2.623377463  | 1.610462971  | -1.293437951 |
| C  | 4.091391713  | 0.803741325  | 0.951528794  |
| C  | 3.889746786  | 1.036655093  | -1.429458957 |
| C  | 4.639101792  | 0.625159921  | -0.323239360 |
| H  | 4.669931669  | 0.502167809  | 1.829359066  |
| H  | 4.308369493  | 0.917207458  | -2.432991692 |
| C  | -2.966055483 | 2.103056080  | -1.890599231 |
| H  | -2.187853178 | 1.345061192  | -2.074591403 |
| H  | -3.753277699 | 1.978095175  | -2.645869031 |
| H  | -2.500144597 | 3.088579591  | -2.049821727 |
| C  | -2.324140032 | 2.203354018  | 3.123658951  |
| H  | -2.892106471 | 2.099545793  | 4.057359679  |
| H  | -1.514979085 | 1.455521645  | 3.129098809  |
| H  | -1.846442141 | 3.195711186  | 3.127985780  |
| C  | -6.879030351 | 1.261331444  | 1.183478242  |
| H  | -7.031363711 | 0.466657275  | 1.929275970  |
| H  | -7.407534709 | 2.154996753  | 1.553473481  |
| H  | -7.364887409 | 0.951422519  | 0.248143288  |
| C  | 1.863022666  | 2.092466386  | -2.494488936 |
| H  | 2.302048094  | 1.697695274  | -3.421021973 |

|   |              |              |              |
|---|--------------|--------------|--------------|
| H | 0.803370134  | 1.802155281  | -2.452997629 |
| H | 1.888810357  | 3.192307079  | -2.565407979 |
| C | 2.291142931  | 1.601118674  | 2.528482547  |
| H | 1.362127624  | 1.035519748  | 2.698495338  |
| H | 3.022122950  | 1.294472471  | 3.287838818  |
| H | 2.057079298  | 2.664498552  | 2.694753033  |
| C | 6.013884737  | 0.048182070  | -0.492647090 |
| H | 6.780676785  | 0.827691443  | -0.350869551 |
| H | 6.216173261  | -0.740090954 | 0.246694718  |
| H | 6.158202999  | -0.372993283 | -1.497428324 |
| C | -0.282865930 | -1.338981030 | -4.266886537 |
| H | 0.552525957  | -0.850257900 | -4.789078477 |
| H | -0.207767810 | -2.426389216 | -4.412158816 |
| H | -1.229345246 | -0.987632986 | -4.703431409 |
| C | -0.243294156 | -1.019810725 | -2.854552656 |
| N | -0.222295731 | -0.756474181 | -1.728361969 |
| C | 0.093967417  | -5.273683185 | 1.115283106  |
| C | -1.021030584 | -4.577737938 | 1.575123620  |
| C | -1.115869699 | -3.214359826 | 1.327122660  |
| N | -0.172869592 | -2.538362085 | 0.650926244  |
| C | 0.900024369  | -3.211259260 | 0.205363070  |
| C | 1.074587179  | -4.572559827 | 0.418128684  |
| H | 0.198364007  | -6.345423645 | 1.299252788  |
| H | -1.816330950 | -5.080038364 | 2.128430150  |
| H | -1.966577272 | -2.629174801 | 1.680428654  |
| H | 1.647370306  | -2.627997773 | -0.340515627 |
| H | 1.969791474  | -5.068852256 | 0.039567091  |

[Ir(H)<sub>2</sub>(IMes)(MeCN)(Py)<sub>2</sub>]Cl (**3**)

SCF-energy: -1656.0804281

SCF + E(vib0): -1655.4300980

|    |              |              |              |
|----|--------------|--------------|--------------|
| Ir | -0.029341905 | 0.583797750  | -0.452036160 |
| H  | -1.398062415 | 0.229917873  | -1.134522901 |
| H  | 0.627556729  | 0.362259478  | -1.869706974 |
| C  | -0.349860532 | -3.610612555 | -0.122696619 |
| C  | 0.995798365  | -3.509836569 | -0.057214374 |
| H  | -1.006422186 | -4.476123269 | -0.120517044 |
| H  | 1.771348577  | -4.267232640 | 0.015303880  |
| C  | 0.165905227  | -1.394598792 | -0.206195175 |
| N  | -0.843205332 | -2.321689698 | -0.211664422 |
| N  | 1.297534349  | -2.159075048 | -0.107120181 |
| C  | -2.253013990 | -2.078991512 | -0.299511730 |
| C  | -3.006699249 | -2.035506599 | 0.880869814  |

|   |              |              |              |
|---|--------------|--------------|--------------|
| C | -2.850177329 | -1.990520495 | -1.568670430 |
| C | -4.388080521 | -1.843082596 | 0.768016902  |
| C | -4.230562250 | -1.798301140 | -1.625370037 |
| C | -5.018851843 | -1.717454800 | -0.471105163 |
| H | -4.988678299 | -1.803680724 | 1.681413543  |
| H | -4.708874913 | -1.721417269 | -2.606218134 |
| C | 2.658544599  | -1.718949133 | -0.043231003 |
| C | 3.375334434  | -1.523668668 | -1.233967196 |
| C | 3.264259489  | -1.602081190 | 1.216427796  |
| C | 4.721890271  | -1.164679553 | -1.131154793 |
| C | 4.616784281  | -1.251544083 | 1.264704504  |
| C | 5.364262100  | -1.029191773 | 0.103734373  |
| H | 5.292776133  | -1.009645161 | -2.051332766 |
| H | 5.104609091  | -1.169222815 | 2.241093384  |
| C | -2.367869626 | -2.229042002 | 2.225529879  |
| H | -1.435383154 | -1.654775099 | 2.323758501  |
| H | -3.049162474 | -1.925869598 | 3.032070266  |
| H | -2.110297929 | -3.287845025 | 2.394581245  |
| C | -2.029685940 | -2.100822185 | -2.818981129 |
| H | -2.666668983 | -2.060091121 | -3.712307542 |
| H | -1.292583335 | -1.283917338 | -2.877215989 |
| H | -1.465175987 | -3.046256121 | -2.848076241 |
| C | -6.505654341 | -1.537795880 | -0.574133079 |
| H | -6.765046915 | -0.723783987 | -1.267874853 |
| H | -6.984521163 | -2.452426441 | -0.959841919 |
| H | -6.957227460 | -1.313822075 | 0.402115955  |
| C | 2.494662278  | -1.869766205 | 2.477008814  |
| H | 3.046195377  | -1.517702438 | 3.359325938  |
| H | 1.508123700  | -1.383787023 | 2.461750750  |
| H | 2.311778404  | -2.948368464 | 2.613260817  |
| C | 2.729660967  | -1.716037775 | -2.573119240 |
| H | 1.921775571  | -0.984319389 | -2.728154410 |
| H | 3.462254120  | -1.603225112 | -3.382981215 |
| H | 2.277762726  | -2.716720663 | -2.659997936 |
| C | 6.828421680  | -0.703079250 | 0.175101317  |
| H | 7.435574451  | -1.609886946 | 0.018102423  |
| H | 7.123509351  | 0.017328258  | -0.601954525 |
| H | 7.110635532  | -0.292741172 | 1.155497053  |
| C | 4.125567642  | 2.370423330  | 0.897161626  |
| H | 4.638705877  | 2.644743772  | -0.036220214 |
| H | 3.970767548  | 3.277645726  | 1.498852912  |
| H | 4.761257423  | 1.667333772  | 1.453789219  |
| C | 2.856608060  | 1.741875764  | 0.591053109  |
| N | 1.848385608  | 1.238961397  | 0.328741126  |
| C | -2.454529079 | 1.622346757  | 3.828520639  |

|   |              |             |              |
|---|--------------|-------------|--------------|
| C | -3.121936368 | 1.555380281 | 2.608972867  |
| C | -2.401382400 | 1.238721330 | 1.461472677  |
| N | -1.082177497 | 0.999664180 | 1.479205423  |
| C | -0.441775863 | 1.064847762 | 2.655428856  |
| C | -1.084515137 | 1.369769282 | 3.850060556  |
| H | -2.991891488 | 1.866433140 | 4.747940264  |
| H | -4.194987997 | 1.741121353 | 2.536448643  |
| H | -2.888695786 | 1.162196966 | 0.487414189  |
| H | 0.632287425  | 0.865742467 | 2.629060409  |
| H | -0.513804539 | 1.406895257 | 4.779835195  |
| C | -0.864336613 | 5.278715867 | -1.758193288 |
| C | -1.046008703 | 4.228986725 | -2.654843168 |
| C | -0.792935970 | 2.929343219 | -2.235109088 |
| N | -0.375908266 | 2.638413595 | -0.991354970 |
| C | -0.201593126 | 3.651592586 | -0.129897854 |
| C | -0.432998374 | 4.979347518 | -0.469346257 |
| H | -1.056104532 | 6.311307423 | -2.058842141 |
| H | -1.382472642 | 4.406298897 | -3.677773673 |
| H | -0.922046016 | 2.078125587 | -2.904518350 |
| H | 0.134715976  | 3.380377080 | 0.873041938  |
| H | -0.276421181 | 5.762267379 | 0.274870306  |

[Ir(H)<sub>2</sub>(IMes)(Py)<sub>2</sub>]Cl (**3-A**)

SCF-energy: -1523.5523410

SCF + E(vib0): -1522.9507095

|    |              |             |              |
|----|--------------|-------------|--------------|
| Ir | -0.224803449 | 0.413767358 | -0.478081555 |
| C  | -0.489961061 | 5.224341354 | -1.525401030 |
| C  | 0.484313427  | 4.742921473 | -0.655473305 |
| C  | 0.506038746  | 3.385945380 | -0.359284925 |
| N  | -0.369186609 | 2.511993098 | -0.880554038 |
| C  | -1.306485768 | 2.978570615 | -1.723481542 |
| C  | -1.401321221 | 4.320782505 | -2.066323860 |
| H  | -0.536807339 | 6.285667807 | -1.779649976 |
| H  | 1.224498734  | 5.406289685 | -0.204929171 |
| H  | 1.256289359  | 2.977940032 | 0.323124317  |
| H  | -1.992337436 | 2.236490658 | -2.135374475 |
| H  | -2.182580117 | 4.645089337 | -2.755779696 |
| C  | -0.599201861 | 1.793146970 | 4.328203443  |
| C  | -1.731363658 | 1.601919082 | 3.540056437  |
| C  | -1.573297482 | 1.169359994 | 2.228184004  |
| N  | -0.370925057 | 0.923299145 | 1.685715781  |
| C  | 0.717434251  | 1.105683270 | 2.448429486  |

|   |              |              |              |
|---|--------------|--------------|--------------|
| C | 0.650157138  | 1.539542700  | 3.767939803  |
| H | -0.689054290 | 2.133587697  | 5.362394443  |
| H | -2.733645942 | 1.785700118  | 3.931031602  |
| H | -2.437150162 | 1.009645881  | 1.578659492  |
| H | 1.683398080  | 0.883090554  | 1.983329982  |
| H | 1.569017894  | 1.671673893  | 4.342029876  |
| H | -1.728271051 | 0.203067716  | -0.656432794 |
| H | -0.146212039 | 0.176520528  | -2.039425162 |
| C | -0.376614353 | -3.791193413 | -0.399195717 |
| C | 0.950858532  | -3.597267536 | -0.212890431 |
| H | -0.960157103 | -4.702695022 | -0.494986493 |
| H | 1.771666136  | -4.302223190 | -0.113720704 |
| C | -0.029946871 | -1.555466749 | -0.326193170 |
| N | -0.962747362 | -2.537609420 | -0.464984694 |
| N | 1.145578345  | -2.227243429 | -0.168040156 |
| C | -2.370511141 | -2.333956212 | -0.637501118 |
| C | -3.188990524 | -2.289877012 | 0.501579380  |
| C | -2.891366200 | -2.233298968 | -1.936471056 |
| C | -4.561031315 | -2.110677545 | 0.311979384  |
| C | -4.270817081 | -2.057513356 | -2.069956631 |
| C | -5.122189205 | -1.988249271 | -0.963048855 |
| H | -5.213571570 | -2.079919948 | 1.189295773  |
| H | -4.694294254 | -1.982808663 | -3.075624400 |
| C | 2.404363594  | -1.584839050 | 0.056367670  |
| C | 3.145484359  | -1.113855814 | -1.043652885 |
| C | 2.884285745  | -1.489134116 | 1.373042508  |
| C | 4.365395306  | -0.486533686 | -0.781965993 |
| C | 4.114736357  | -0.856257357 | 1.576530380  |
| C | 4.867246498  | -0.342831608 | 0.516583518  |
| H | 4.952960538  | -0.114609732 | -1.626206195 |
| H | 4.502769630  | -0.775721877 | 2.596115532  |
| C | -2.612563483 | -2.455968494 | 1.877698493  |
| H | -1.791523322 | -1.746144203 | 2.062620996  |
| H | -3.380598128 | -2.301762899 | 2.647217232  |
| H | -2.197971090 | -3.467101151 | 2.020869122  |
| C | -1.999594170 | -2.316892151 | -3.139546996 |
| H | -2.584535901 | -2.256982195 | -4.066643845 |
| H | -1.263233249 | -1.497418952 | -3.142443865 |
| H | -1.431624017 | -3.260332872 | -3.158908739 |
| C | -6.597425386 | -1.774854228 | -1.138824868 |
| H | -6.836491930 | -0.698704451 | -1.168387879 |
| H | -6.959657320 | -2.213761178 | -2.079309965 |
| H | -7.171513977 | -2.214392994 | -0.310912309 |
| C | 2.123700380  | -2.078490217 | 2.526053004  |
| H | 2.224097618  | -3.176144222 | 2.546322694  |



|   |             |              |              |
|---|-------------|--------------|--------------|
| H | 2.503837720 | -1.699883925 | 3.484439569  |
| H | 1.047137422 | -1.860217344 | 2.467483941  |
| C | 2.670095670 | -1.318497367 | -2.452761468 |
| H | 1.711371945 | -0.809525560 | -2.635541534 |
| H | 3.405808159 | -0.935658514 | -3.171933538 |
| H | 2.512884365 | -2.387747529 | -2.665735551 |
| C | 6.194639472 | 0.316202832  | 0.751753671  |
| H | 6.236720340 | 1.310719170  | 0.281763670  |
| H | 6.407627483 | 0.433959037  | 1.822932743  |
| H | 7.010334927 | -0.279555958 | 0.311900949  |

[Ir(H)<sub>2</sub>(IMes)(MeCN)(Py)]Cl (**3-Py**)

SCF-energy: -1408.2300922

SCF + E(vib0): -1407.6728807

|    |              |              |              |
|----|--------------|--------------|--------------|
| Ir | -0.302463724 | -0.422487876 | 0.371553344  |
| H  | -1.829806332 | -0.409649211 | 0.443063648  |
| H  | -0.393765945 | -0.268019852 | 1.941162609  |
| C  | -0.844757626 | 3.755908070  | 0.391589392  |
| C  | 0.497327637  | 3.671120089  | 0.220321820  |
| H  | -1.501041906 | 4.616722563  | 0.485367691  |
| H  | 1.259600526  | 4.441034838  | 0.136756451  |
| C  | -0.320014454 | 1.561763794  | 0.302567575  |
| N  | -1.330163466 | 2.458702007  | 0.440779899  |
| N  | 0.799715138  | 2.321810060  | 0.167599214  |
| C  | -2.714415953 | 2.134473757  | 0.624643280  |
| C  | -3.527670017 | 1.971355574  | -0.505144627 |
| C  | -3.215930070 | 2.021164366  | 1.931076004  |
| C  | -4.877848273 | 1.676583758  | -0.299101226 |
| C  | -4.571596354 | 1.725522023  | 2.080924115  |
| C  | -5.420295261 | 1.551255165  | 0.982261106  |
| H  | -5.526584586 | 1.545825362  | -1.169811736 |
| H  | -4.978900839 | 1.632508056  | 3.091828072  |
| C  | 2.103280573  | 1.753175704  | 0.003686640  |
| C  | 2.830734155  | 1.373110999  | 1.146169166  |
| C  | 2.623377463  | 1.610462971  | -1.293437951 |
| C  | 4.091391713  | 0.803741325  | 0.951528794  |
| C  | 3.889746786  | 1.036655093  | -1.429458957 |
| C  | 4.639101792  | 0.625159921  | -0.323239360 |
| H  | 4.669931669  | 0.502167809  | 1.829359066  |
| H  | 4.308369493  | 0.917207458  | -2.432991692 |
| C  | -2.966055483 | 2.103056080  | -1.890599231 |
| H  | -2.187853178 | 1.345061192  | -2.074591403 |
| H  | -3.753277699 | 1.978095175  | -2.645869031 |

|   |              |              |              |
|---|--------------|--------------|--------------|
| H | -2.500144597 | 3.088579591  | -2.049821727 |
| C | -2.324140032 | 2.203354018  | 3.123658951  |
| H | -2.892106471 | 2.099545793  | 4.057359679  |
| H | -1.514979085 | 1.455521645  | 3.129098809  |
| H | -1.846442141 | 3.195711186  | 3.127985780  |
| C | -6.879030351 | 1.261331444  | 1.183478242  |
| H | -7.031363711 | 0.466657275  | 1.929275970  |
| H | -7.407534709 | 2.154996753  | 1.553473481  |
| H | -7.364887409 | 0.951422519  | 0.248143288  |
| C | 1.863022666  | 2.092466386  | -2.494488936 |
| H | 2.302048094  | 1.697695274  | -3.421021973 |
| H | 0.803370134  | 1.802155281  | -2.452997629 |
| H | 1.888810357  | 3.192307079  | -2.565407979 |
| C | 2.291142931  | 1.601118674  | 2.528482547  |
| H | 1.362127624  | 1.035519748  | 2.698495338  |
| H | 3.022122950  | 1.294472471  | 3.287838818  |
| H | 2.057079298  | 2.664498552  | 2.694753033  |
| C | 6.013884737  | 0.048182070  | -0.492647090 |
| H | 6.780676785  | 0.827691443  | -0.350869551 |
| H | 6.216173261  | -0.740090954 | 0.246694718  |
| H | 6.158202999  | -0.372993283 | -1.497428324 |
| C | -0.282865930 | -1.338981030 | -4.266886537 |
| H | 0.552525957  | -0.850257900 | -4.789078477 |
| H | -0.207767810 | -2.426389216 | -4.412158816 |
| H | -1.229345246 | -0.987632986 | -4.703431409 |
| C | -0.243294156 | -1.019810725 | -2.854552656 |
| N | -0.222295731 | -0.756474181 | -1.728361969 |
| C | 0.093967417  | -5.273683185 | 1.115283106  |
| C | -1.021030584 | -4.577737938 | 1.575123620  |
| C | -1.115869699 | -3.214359826 | 1.327122660  |
| N | -0.172869592 | -2.538362085 | 0.650926244  |
| C | 0.900024369  | -3.211259260 | 0.205363070  |
| C | 1.074587179  | -4.572559827 | 0.418128684  |
| H | 0.198364007  | -6.345423645 | 1.299252788  |
| H | -1.816330950 | -5.080038364 | 2.128430150  |
| H | -1.966577272 | -2.629174801 | 1.680428654  |
| H | 1.647370306  | -2.627997773 | -0.340515627 |
| H | 1.969791474  | -5.068852256 | 0.039567091  |

**[Ir(IMes)(Py)<sub>2</sub>(*trans*-3-hexenedinitrile)]Cl *trans*-3-hexenedinitrile bound through alkene**

SCF-energy: -1864.5866792

SCF + E(vib0): -1863.8737389

|    |             |             |              |
|----|-------------|-------------|--------------|
| Ir | 0.060156938 | 0.441767672 | -0.268371072 |
|----|-------------|-------------|--------------|

|   |              |              |              |
|---|--------------|--------------|--------------|
| C | -0.756047379 | 5.017079289  | -2.004313415 |
| C | -0.311033305 | 3.984855310  | -2.826437591 |
| C | -0.091289653 | 2.729288675  | -2.274923892 |
| N | -0.290664532 | 2.463510053  | -0.971540155 |
| C | -0.721763726 | 3.460525933  | -0.180371552 |
| C | -0.964218083 | 4.744067428  | -0.656029487 |
| H | -0.933978741 | 6.016639396  | -2.407507775 |
| H | -0.130693726 | 4.141580513  | -3.891281881 |
| H | 0.254629159  | 1.896126122  | -2.887437762 |
| H | -0.867070533 | 3.229202010  | 0.877424875  |
| H | -1.305182061 | 5.513349810  | 0.038838551  |
| C | -4.484735984 | 1.488007048  | 1.839179278  |
| C | -3.482584734 | 1.016116671  | 2.678719973  |
| C | -2.259319576 | 0.655631180  | 2.124455754  |
| N | -1.976852931 | 0.755180184  | 0.820978099  |
| C | -2.962129491 | 1.181629608  | 0.013779342  |
| C | -4.218075387 | 1.556138645  | 0.474613804  |
| H | -5.456300999 | 1.789006163  | 2.237915860  |
| H | -3.632161473 | 0.930143302  | 3.756244388  |
| H | -1.475704968 | 0.261121487  | 2.766088090  |
| H | -2.725611809 | 1.225697743  | -1.050498370 |
| H | -4.970881131 | 1.899554143  | -0.237026285 |
| H | -0.888680756 | 0.041427445  | -1.471130083 |
| H | 1.242147308  | 0.289422347  | -1.269277210 |
| C | -0.254637632 | -3.805774373 | -0.235053861 |
| C | 1.086573552  | -3.700451432 | -0.342831603 |
| H | -0.911474034 | -4.671091885 | -0.227471974 |
| H | 1.861789562  | -4.453624399 | -0.452342025 |
| C | 0.254114535  | -1.587714149 | -0.157420103 |
| N | -0.748616164 | -2.518486034 | -0.129581887 |
| N | 1.386358285  | -2.350751901 | -0.299216216 |
| C | -2.166648395 | -2.311742192 | -0.070714951 |
| C | -2.808374760 | -2.395181051 | 1.170957993  |
| C | -2.883965270 | -2.189282285 | -1.274019331 |
| C | -4.200587756 | -2.268485757 | 1.197613354  |
| C | -4.271248434 | -2.068627533 | -1.191546972 |
| C | -4.949618313 | -2.094633319 | 0.032587243  |
| H | -4.715157628 | -2.322947918 | 2.161117360  |
| H | -4.843866981 | -1.971777307 | -2.118607642 |
| C | 2.745097364  | -1.924680124 | -0.476130876 |
| C | 3.188800274  | -1.601556087 | -1.771602190 |
| C | 3.630028709  | -1.977828369 | 0.614518696  |
| C | 4.521750773  | -1.211201531 | -1.924826637 |
| C | 4.950915189  | -1.570948893 | 0.406371715  |
| C | 5.413914865  | -1.162436175 | -0.847532356 |

|   |              |              |              |
|---|--------------|--------------|--------------|
| H | 4.878098717  | -0.945845483 | -2.924017436 |
| H | 5.642914039  | -1.581557431 | 1.253247129  |
| C | -2.042192346 | -2.669380101 | 2.432727426  |
| H | -1.061379773 | -2.172906710 | 2.438418748  |
| H | -2.607265085 | -2.345832119 | 3.317767035  |
| H | -1.851824016 | -3.749627191 | 2.548659493  |
| C | -2.197581261 | -2.246170289 | -2.607887154 |
| H | -2.917526305 | -2.104727719 | -3.424641360 |
| H | -1.416736610 | -1.475587898 | -2.698514939 |
| H | -1.706464408 | -3.220952422 | -2.761599587 |
| C | -6.442534279 | -1.952498385 | 0.080413346  |
| H | -6.835902463 | -2.125102679 | 1.091468029  |
| H | -6.753672732 | -0.943251043 | -0.234819293 |
| H | -6.932792743 | -2.664619157 | -0.600753589 |
| C | 3.220210060  | -2.513905756 | 1.958757292  |
| H | 2.137301865  | -2.453524949 | 2.133660607  |
| H | 3.496887374  | -3.577879825 | 2.044427114  |
| H | 3.739617687  | -1.985249027 | 2.770774415  |
| C | 2.281334265  | -1.714555639 | -2.961843835 |
| H | 1.393938034  | -1.071386398 | -2.861874019 |
| H | 2.809765718  | -1.435437988 | -3.882693874 |
| H | 1.916859445  | -2.747342806 | -3.084109583 |
| C | 6.823297937  | -0.681464936 | -1.022510651 |
| H | 6.932093573  | 0.339725862  | -0.620955089 |
| H | 7.535596047  | -1.318920179 | -0.478560831 |
| H | 7.117812022  | -0.659144388 | -2.080504578 |
| C | 1.518907782  | 0.581731471  | 1.636935005  |
| C | 1.786680217  | 1.614703972  | 0.765422373  |
| H | 2.120995459  | -0.322696737 | 1.557034754  |
| H | 1.392895306  | 2.601653113  | 1.033005283  |
| C | 0.981366553  | 0.804246806  | 3.032199411  |
| H | 1.846046480  | 0.812238578  | 3.721237541  |
| H | 0.346080085  | -0.027375773 | 3.377071024  |
| C | 3.002166973  | 1.666189505  | -0.133837155 |
| H | 2.804923868  | 2.273114518  | -1.031340497 |
| H | 3.287794462  | 0.662275493  | -0.477295087 |
| C | 0.274766042  | 2.065533846  | 3.210334544  |
| N | -0.288194936 | 3.072640094  | 3.301139344  |
| C | 4.146479187  | 2.242274528  | 0.572209514  |
| N | 5.056573481  | 2.675348045  | 1.141369962  |

**[Ir(IMes)(Py)<sub>2</sub>(*trans*-3-hexenedinitrile)]Cl *trans*-3-hexenedinitrile bound through nitrile group**

SCF-energy: -1864.6267045

SCF + E(vib0): -1863.9148448

|    |              |              |              |
|----|--------------|--------------|--------------|
| Ir | 0.301564943  | -0.243352779 | -0.514898015 |
| C  | -1.645964441 | -4.604544692 | -1.793562813 |
| C  | -0.746299135 | -3.937629902 | -2.621647916 |
| C  | -0.230170153 | -2.714322029 | -2.213788610 |
| N  | -0.560797982 | -2.144562288 | -1.042565976 |
| C  | -1.422889570 | -2.794091324 | -0.245646815 |
| C  | -1.991636217 | -4.017883432 | -0.579466334 |
| H  | -2.072602247 | -5.565764213 | -2.089624069 |
| H  | -0.441227260 | -4.353673765 | -3.583359493 |
| H  | 0.472205121  | -2.155290134 | -2.833043252 |
| H  | -1.665169543 | -2.308075582 | 0.701597844  |
| H  | -2.706513723 | -4.484757997 | 0.101691442  |
| C  | 1.245110912  | -2.332251743 | 3.959140259  |
| C  | 1.942107317  | -2.707841804 | 2.814217089  |
| C  | 1.653545535  | -2.074226816 | 1.609653780  |
| N  | 0.723152006  | -1.114503295 | 1.502417524  |
| C  | 0.052244342  | -0.756167391 | 2.606434404  |
| C  | 0.280118019  | -1.333443872 | 3.850586505  |
| H  | 1.449294753  | -2.809572632 | 4.920417402  |
| H  | 2.708626965  | -3.484298856 | 2.844072232  |
| H  | 2.185777115  | -2.329891522 | 0.691436800  |
| H  | -0.699772373 | 0.026035510  | 2.478481932  |
| H  | -0.294429062 | -1.001283414 | 4.717173460  |
| H  | 1.682731464  | -0.783834788 | -1.031795743 |
| H  | 0.042928795  | 0.249369005  | -1.992816928 |
| C  | 2.957873911  | 3.010825037  | -0.124381895 |
| C  | 1.796875484  | 3.701675032  | -0.098106520 |
| H  | 3.991749537  | 3.342941113  | -0.092495823 |
| H  | 1.595394935  | 4.767668363  | -0.038854480 |
| C  | 1.267311221  | 1.491642401  | -0.252278517 |
| N  | 2.624972631  | 1.671705405  | -0.214971844 |
| N  | 0.776393275  | 2.768143965  | -0.173286657 |
| C  | 3.638836631  | 0.659220838  | -0.248346757 |
| C  | 4.172484835  | 0.199451414  | 0.963475870  |
| C  | 4.123754479  | 0.220282772  | -1.490850423 |
| C  | 5.184770554  | -0.763624292 | 0.907682924  |
| C  | 5.135743149  | -0.740660164 | -1.490851810 |
| C  | 5.678068686  | -1.249485235 | -0.305690922 |
| H  | 5.607669363  | -1.136079925 | 1.845377230  |
| H  | 5.517945190  | -1.098785725 | -2.451194098 |
| C  | -0.594407431 | 3.176908883  | -0.130336483 |
| C  | -1.283868944 | 3.402646489  | -1.330933683 |
| C  | -1.179964182 | 3.422566864  | 1.121506029  |
| C  | -2.606693229 | 3.847786745  | -1.247577143 |

|   |              |              |              |
|---|--------------|--------------|--------------|
| C | -2.504074331 | 3.867313486  | 1.150803743  |
| C | -3.234815136 | 4.088863267  | -0.021760282 |
| H | -3.155576330 | 4.031101046  | -2.175895545 |
| H | -2.971913518 | 4.065322135  | 2.120062334  |
| C | 3.699475645  | 0.742291300  | 2.281057770  |
| H | 2.601738860  | 0.738965749  | 2.355223782  |
| H | 4.104168846  | 0.154935891  | 3.116188159  |
| H | 4.024350920  | 1.786068748  | 2.423143624  |
| C | 3.566502811  | 0.762110570  | -2.772965018 |
| H | 4.081306526  | 0.328151930  | -3.640256165 |
| H | 2.490857589  | 0.538736116  | -2.856122868 |
| H | 3.674626349  | 1.857165833  | -2.828829879 |
| C | 6.789963861  | -2.257164878 | -0.342300949 |
| H | 6.859929216  | -2.820370446 | 0.598908994  |
| H | 6.657775982  | -2.974739149 | -1.165116738 |
| H | 7.761553209  | -1.760198404 | -0.499842261 |
| C | -0.404768403 | 3.234401557  | 2.393079842  |
| H | 0.335921141  | 4.038884958  | 2.531677687  |
| H | -1.069612130 | 3.248584873  | 3.267436585  |
| H | 0.157293746  | 2.288820430  | 2.393228758  |
| C | -0.625188513 | 3.185833542  | -2.659678329 |
| H | -0.370109108 | 2.123759034  | -2.800695160 |
| H | -1.283187168 | 3.498233135  | -3.481088846 |
| H | 0.314183243  | 3.754759432  | -2.739200229 |
| C | -4.636818318 | 4.624722125  | 0.034992671  |
| H | -5.219811740 | 4.340601431  | -0.853056268 |
| H | -5.172776058 | 4.277538426  | 0.930809673  |
| H | -4.628801754 | 5.726663138  | 0.074691146  |
| C | -5.957572277 | -1.052990170 | -0.300146769 |
| C | -4.893907120 | -0.735288295 | 0.437303897  |
| H | -6.424166648 | -0.304363021 | -0.950378405 |
| H | -4.443063963 | -1.494748025 | 1.086306450  |
| C | -6.610732146 | -2.409221150 | -0.324309912 |
| H | -6.772672201 | -2.729535658 | -1.367747269 |
| H | -7.616070455 | -2.363251935 | 0.130746474  |
| C | -4.240342456 | 0.619906858  | 0.449444589  |
| H | -4.382686897 | 1.124051404  | 1.422239069  |
| H | -4.665022185 | 1.289048309  | -0.315504170 |
| C | -5.830867928 | -3.439353779 | 0.351030511  |
| N | -5.161738807 | -4.223652253 | 0.875877318  |
| C | -2.803392551 | 0.507522755  | 0.221527244  |
| N | -1.671153537 | 0.348188491  | 0.045204496  |

**[Ir(IMes)(Py)<sub>2</sub>(*cis*-3-hexenedinitrile)]Cl *cis*-3-hexenedinitrile bound through alkene group**

SCF-energy: -1864.5907241

SCF + E(vib0): -1863.8772883

|    |              |              |              |
|----|--------------|--------------|--------------|
| Ir | -0.218735278 | 0.442393889  | -0.483204007 |
| C  | -1.835564749 | 4.927067478  | -1.843022656 |
| C  | -1.499963512 | 3.949170459  | -2.774390500 |
| C  | -1.021146601 | 2.725792465  | -2.327247245 |
| N  | -0.860279384 | 2.436754888  | -1.022413599 |
| C  | -1.201381239 | 3.379451608  | -0.129973103 |
| C  | -1.686953076 | 4.628389853  | -0.493215062 |
| H  | -2.203904548 | 5.903961658  | -2.163656062 |
| H  | -1.600876068 | 4.125152756  | -3.846583877 |
| H  | -0.755839571 | 1.934643542  | -3.028874728 |
| H  | -1.073696288 | 3.123758791  | 0.921549791  |
| H  | -1.931005956 | 5.356381862  | 0.281919619  |
| C  | -3.029256143 | 0.857544676  | 3.674545216  |
| C  | -1.686819443 | 0.506437936  | 3.791355833  |
| C  | -0.922948957 | 0.384061697  | 2.636174064  |
| N  | -1.416256503 | 0.597357853  | 1.406420304  |
| C  | -2.717494632 | 0.910350183  | 1.297296018  |
| C  | -3.552378292 | 1.054997096  | 2.399781750  |
| H  | -3.657109233 | 0.969623502  | 4.561633651  |
| H  | -1.225623405 | 0.329144767  | 4.764574708  |
| H  | 0.129059203  | 0.100449918  | 2.696411046  |
| H  | -3.095908267 | 1.047454039  | 0.282553573  |
| H  | -4.600936412 | 1.317128565  | 2.248153630  |
| H  | -1.584748391 | -0.018115044 | -1.130418036 |
| H  | 0.281247262  | 0.227334329  | -1.965807335 |

|   |              |              |              |
|---|--------------|--------------|--------------|
| C | -0.499939301 | -3.775864053 | -0.153558887 |
| C | 0.835891738  | -3.693007003 | 0.020420103  |
| H | -1.169183270 | -4.630939027 | -0.185849124 |
| H | 1.592884285  | -4.456998227 | 0.173806209  |
| C | 0.057066485  | -1.566354005 | -0.237018093 |
| N | -0.962824611 | -2.484357192 | -0.312581461 |
| N | 1.163433219  | -2.349789259 | -0.033895570 |
| C | -2.359159384 | -2.267084967 | -0.572074288 |
| C | -3.263341689 | -2.312229030 | 0.496811678  |
| C | -2.792592070 | -2.157553976 | -1.907337975 |
| C | -4.624403058 | -2.150606381 | 0.210167544  |
| C | -4.158421786 | -2.000964178 | -2.136523567 |
| C | -5.092819794 | -1.982630224 | -1.092841191 |
| H | -5.340611862 | -2.175781878 | 1.036727452  |
| H | -4.508135090 | -1.907006906 | -3.168582930 |
| C | 2.549249012  | -1.979425426 | 0.020096168  |
| C | 3.271539370  | -1.949049763 | -1.189264684 |
| C | 3.174925977  | -1.787625524 | 1.260125513  |
| C | 4.632520012  | -1.650176607 | -1.128595036 |
| C | 4.539932298  | -1.479748211 | 1.262320609  |
| C | 5.285253809  | -1.397996088 | 0.085319978  |
| H | 5.205705213  | -1.622890752 | -2.059668684 |
| H | 5.035586941  | -1.307363388 | 2.221837486  |
| C | -2.819483355 | -2.593601607 | 1.902798777  |
| H | -1.815731419 | -2.201674695 | 2.113333316  |
| H | -3.521236100 | -2.165114215 | 2.631367151  |
| H | -2.785551684 | -3.679989291 | 2.089949222  |



|   |              |              |              |
|---|--------------|--------------|--------------|
| C | -1.823486765 | -2.220680456 | -3.049185043 |
| H | -2.352682038 | -2.249517642 | -4.010531752 |
| H | -1.154496537 | -1.345327569 | -3.048523402 |
| H | -1.184218296 | -3.115411073 | -2.987000562 |
| C | -6.556265355 | -1.820250026 | -1.383223370 |
| H | -7.155769065 | -1.811019349 | -0.462805081 |
| H | -6.753208437 | -0.883863957 | -1.928387968 |
| H | -6.925576877 | -2.641956453 | -2.016912258 |
| C | 2.447765225  | -1.936157037 | 2.567063151  |
| H | 1.357975445  | -1.978182320 | 2.440883185  |
| H | 2.752543094  | -2.867177238 | 3.072345258  |
| H | 2.697032380  | -1.110889210 | 3.251496088  |
| C | 2.598441361  | -2.226216095 | -2.502347059 |
| H | 1.777291147  | -1.517294421 | -2.693842023 |
| H | 3.314408495  | -2.155282387 | -3.331588346 |
| H | 2.158000506  | -3.235939754 | -2.525173776 |
| C | 6.741768609  | -1.041076586 | 0.118061751  |
| H | 6.874352202  | 0.052910507  | 0.081743274  |
| H | 7.223020889  | -1.393856906 | 1.040922166  |
| H | 7.282107090  | -1.466548889 | -0.739097561 |
| C | 1.990489231  | 1.138464340  | -0.564639607 |
| C | 1.610229630  | 1.211860007  | 0.766089147  |
| H | 2.471328631  | 0.207919943  | -0.863461343 |
| H | 1.834917555  | 0.319379933  | 1.354135475  |
| C | 2.400241346  | 2.242186955  | -1.515642870 |
| H | 2.114430168  | 1.964497172  | -2.543168263 |
| H | 3.505447075  | 2.267509123  | -1.514299267 |

|   |             |             |              |
|---|-------------|-------------|--------------|
| C | 1.516617561 | 2.467207139 | 1.609296701  |
| H | 0.642828917 | 2.443048488 | 2.281569056  |
| H | 1.434547530 | 3.385657195 | 1.012098882  |
| C | 1.954443815 | 3.611055921 | -1.290125910 |
| N | 1.631692213 | 4.712331340 | -1.138293289 |
| C | 2.704352870 | 2.562081121 | 2.457414968  |
| N | 3.645270209 | 2.577998979 | 3.131139359  |

**[Ir(IMes)(Py)<sub>2</sub>(*cis*-3-hexenedinitrile)]Cl *cis*-3-hexenedinitrile bound through nitrile group**

SCF-energy: -1864.6219416

SCF + E(vib0): -1863.9097439

|    |              |              |              |
|----|--------------|--------------|--------------|
| Ir | 0.288969784  | -0.304118975 | -0.419197854 |
| C  | -1.571359519 | -4.740196073 | -1.558786098 |
| C  | -0.765886070 | -4.036279522 | -2.450260751 |
| C  | -0.277296504 | -2.789477317 | -2.080882262 |
| N  | -0.551642797 | -2.227571460 | -0.891678714 |
| C  | -1.329810721 | -2.906487281 | -0.036028562 |
| C  | -1.857121149 | -4.159298738 | -0.326729321 |
| H  | -1.967367159 | -5.724432624 | -1.819586073 |
| H  | -0.510069114 | -4.443647413 | -3.429811941 |
| H  | 0.358573335  | -2.204801614 | -2.746663268 |
| H  | -1.531180683 | -2.421753988 | 0.921498450  |
| H  | -2.479257103 | -4.668018434 | 0.411875417  |
| C  | 1.379642353  | -2.202981927 | 4.105061833  |
| C  | 2.064907168  | -2.602512412 | 2.961023351  |
| C  | 1.729606932  | -2.029049393 | 1.738570719  |
| N  | 0.764915373  | -1.105875239 | 1.613597558  |
| C  | 0.103739352  | -0.725434993 | 2.716371109  |

|   |              |              |              |
|---|--------------|--------------|--------------|
| C | 0.377960246  | -1.243177833 | 3.977523750  |
| H | 1.621842531  | -2.631371384 | 5.080524504  |
| H | 2.859334312  | -3.349717281 | 3.005609281  |
| H | 2.252443796  | -2.302472071 | 0.819937509  |
| H | -0.677395484 | 0.024920745  | 2.572223042  |
| H | -0.188879696 | -0.894392155 | 4.842718026  |
| H | 1.669776179  | -0.828852632 | -0.950873328 |
| H | -0.005250444 | 0.155729906  | -1.901258538 |
| C | 2.920551008  | 2.985281413  | -0.194072623 |
| C | 1.755117340  | 3.664182126  | -0.115717454 |
| H | 3.951239929  | 3.327571864  | -0.219917053 |
| H | 1.544267580  | 4.728395870  | -0.058133640 |
| C | 1.240551987  | 1.448875454  | -0.216962460 |
| N | 2.597078963  | 1.642078539  | -0.251458509 |
| N | 0.741814649  | 2.720517663  | -0.126471246 |
| C | 3.621929979  | 0.642680731  | -0.316370137 |
| C | 4.218623577  | 0.212373594  | 0.876900614  |
| C | 4.057420693  | 0.191012206  | -1.572620760 |
| C | 5.243797429  | -0.734817026 | 0.790268462  |
| C | 5.084825355  | -0.752845639 | -1.603532961 |
| C | 5.689773086  | -1.232373526 | -0.436534447 |
| H | 5.715764320  | -1.084160504 | 1.713313819  |
| H | 5.429387066  | -1.120278968 | -2.574570175 |
| C | -0.626133671 | 3.127739776  | -0.008136190 |
| C | -1.382711555 | 3.349596967  | -1.168820497 |
| C | -1.134757792 | 3.389329188  | 1.273191211  |
| C | -2.691337914 | 3.815905805  | -1.014878385 |

|   |              |              |              |
|---|--------------|--------------|--------------|
| C | -2.448105470 | 3.856155847  | 1.374310474  |
| C | -3.240610912 | 4.083352696  | 0.244453843  |
| H | -3.301986599 | 3.980092911  | -1.906820159 |
| H | -2.856436252 | 4.069308623  | 2.366976708  |
| C | 3.799839121  | 0.772425176  | 2.205676688  |
| H | 2.705890727  | 0.783932622  | 2.320200900  |
| H | 4.228621561  | 0.188537858  | 3.031248432  |
| H | 4.142594184  | 1.813417760  | 2.325170049  |
| C | 3.432761246  | 0.701724529  | -2.836122984 |
| H | 3.922718026  | 0.271398130  | -3.719496987 |
| H | 2.361016558  | 0.449187520  | -2.870757138 |
| H | 3.507039708  | 1.798499375  | -2.908472087 |
| C | 6.817534700  | -2.220424054 | -0.508328491 |
| H | 6.944927778  | -2.762458781 | 0.439305225  |
| H | 6.658713224  | -2.957304421 | -1.309079377 |
| H | 7.770409641  | -1.709280239 | -0.724150299 |
| C | -0.289250343 | 3.207856730  | 2.500774392  |
| H | 0.453850349  | 4.016670838  | 2.597008206  |
| H | -0.905874698 | 3.222861900  | 3.409875272  |
| H | 0.276300190  | 2.264725762  | 2.475262582  |
| C | -0.807054700 | 3.105186109  | -2.531391778 |
| H | -0.562298416 | 2.040311698  | -2.669445195 |
| H | -1.514837181 | 3.404672010  | -3.315160652 |
| H | 0.126796494  | 3.669991455  | -2.680238527 |
| C | -4.628433356 | 4.642268103  | 0.370264236  |
| H | -5.281396705 | 4.282941706  | -0.438103209 |
| H | -5.085506967 | 4.388184388  | 1.338142368  |

|   |              |              |              |
|---|--------------|--------------|--------------|
| H | -4.606299677 | 5.742819687  | 0.304129288  |
| C | -6.031596337 | -0.801455861 | -0.760726734 |
| C | -5.076447770 | -0.547416909 | 0.139054880  |
| H | -6.503956565 | -1.787576088 | -0.694234242 |
| H | -4.856485943 | -1.348933293 | 0.852090324  |
| C | -6.616958372 | 0.014743339  | -1.880081505 |
| H | -7.708524404 | 0.092401095  | -1.729102187 |
| H | -6.500409458 | -0.544582541 | -2.825538783 |
| C | -4.266641126 | 0.708094680  | 0.335000854  |
| H | -4.466335681 | 1.137860623  | 1.332650805  |
| H | -4.505016622 | 1.497818058  | -0.391157747 |
| C | -6.112238383 | 1.363213315  | -2.105259590 |
| N | -5.730028827 | 2.437725648  | -2.300328834 |
| C | -2.831988893 | 0.463770354  | 0.244515937  |
| N | -1.696412506 | 0.269731301  | 0.137273907  |

**[Ir(IMes)(CO)<sub>2</sub>]Cl**

SCF-energy: -1713.1197939

SCF + E(vib0): -1712.6996611

|    |              |              |              |
|----|--------------|--------------|--------------|
| Ir | -0.075704140 | 0.371587952  | -0.443745196 |
| C  | -0.762838855 | -3.875137483 | -0.540939240 |
| C  | 0.489710808  | -3.873296803 | -0.021704729 |
| H  | -1.432538848 | -4.689586450 | -0.801945207 |
| H  | 1.149207998  | -4.685990780 | 0.269219052  |
| C  | -0.124316881 | -1.723196971 | -0.318534234 |
| N  | -1.123321430 | -2.551584965 | -0.711004187 |
| N  | 0.861899625  | -2.548750840 | 0.111296972  |
| C  | -2.407403072 | -2.149049949 | -1.213366797 |
| C  | -3.453555325 | -1.936154957 | -0.302932633 |
| C  | -2.592772068 | -2.054982269 | -2.602116719 |
| C  | -4.698274963 | -1.565759998 | -0.818415093 |
| C  | -3.857141149 | -1.679264517 | -3.060601730 |
| C  | -4.917678011 | -1.417312540 | -2.189310845 |
| H  | -5.523688499 | -1.394652281 | -0.121200302 |
| H  | -4.015743910 | -1.594806341 | -4.139548605 |

|    |              |              |              |
|----|--------------|--------------|--------------|
| C  | 2.124436381  | -2.142798493 | 0.663554006  |
| C  | 3.247601952  | -2.091750557 | -0.178207847 |
| C  | 2.209015072  | -1.883329018 | 2.039763301  |
| C  | 4.464302074  | -1.710324713 | 0.391218909  |
| C  | 3.452514856  | -1.508915677 | 2.555362994  |
| C  | 4.587005493  | -1.401603971 | 1.748502333  |
| H  | 5.346881755  | -1.657101939 | -0.252533427 |
| H  | 3.534253156  | -1.301058209 | 3.626208192  |
| C  | -3.267145553 | -2.095084221 | 1.178264639  |
| H  | -2.840700542 | -1.185797911 | 1.628796349  |
| H  | -4.231715110 | -2.281146423 | 1.670238076  |
| H  | -2.592316362 | -2.927549811 | 1.425810840  |
| C  | -1.481169004 | -2.346391682 | -3.563476864 |
| H  | -1.845820453 | -2.315250902 | -4.598874759 |
| H  | -0.668618915 | -1.607610446 | -3.457698629 |
| H  | -1.040547260 | -3.340827489 | -3.388403286 |
| C  | -6.253402954 | -0.976003305 | -2.713919098 |
| H  | -7.069849799 | -1.259724904 | -2.034330757 |
| H  | -6.284431120 | 0.120951446  | -2.823760657 |
| H  | -6.462478822 | -1.407482257 | -3.703699585 |
| C  | 1.019236366  | -2.000351063 | 2.947504836  |
| H  | 1.340817783  | -2.144643046 | 3.988059134  |
| H  | 0.401410270  | -1.089946533 | 2.919270769  |
| H  | 0.367635569  | -2.842573623 | 2.672070750  |
| C  | 3.152863693  | -2.430616273 | -1.634774041 |
| H  | 2.502994301  | -1.709698279 | -2.158644160 |
| H  | 4.145430109  | -2.407159127 | -2.103994534 |
| H  | 2.726487386  | -3.433912387 | -1.793763911 |
| C  | 5.900922847  | -0.952732111 | 2.319778283  |
| H  | 6.015778652  | 0.139491202  | 2.217914558  |
| H  | 5.980924572  | -1.191590407 | 3.390104549  |
| H  | 6.749546060  | -1.418651141 | 1.798017189  |
| C  | -0.823459755 | 0.579771452  | 1.210117437  |
| O  | -1.294776314 | 0.726094078  | 2.254220128  |
| C  | 0.039702428  | 2.250573843  | -0.706982704 |
| O  | 0.119757579  | 3.374984023  | -0.884374412 |
| Cl | 0.900084986  | 0.146719017  | -2.615724295 |

**[Ir(IMes-*d*<sub>22</sub>)(CO)<sub>2</sub>]Cl**

SCF-energy: -1713.1197939

SCF + E(vib0): -1712.7703845

|    |              |              |              |
|----|--------------|--------------|--------------|
| Ir | -0.075704145 | 0.371587978  | -0.443745228 |
| C  | -0.762838914 | -3.875137779 | -0.540939282 |

|   |              |              |              |
|---|--------------|--------------|--------------|
| C | 0.489710845  | -3.873297099 | -0.021704729 |
| H | -1.432538959 | -4.689586810 | -0.801945266 |
| H | 1.149208088  | -4.685991140 | 0.269219074  |
| C | -0.124316891 | -1.723197104 | -0.318534260 |
| N | -1.123321515 | -2.551585161 | -0.711004240 |
| N | 0.861899693  | -2.548751035 | 0.111296982  |
| C | -2.407403257 | -2.149050113 | -1.213366892 |
| C | -3.453555589 | -1.936155105 | -0.302932655 |
| C | -2.592772264 | -2.054982428 | -2.602116915 |
| C | -4.698275323 | -1.565760120 | -0.818415156 |
| C | -3.857141445 | -1.679264644 | -3.060601963 |
| C | -4.917678386 | -1.417312651 | -2.189311014 |
| H | -5.523688923 | -1.394652387 | -0.121200312 |
| H | -4.015744217 | -1.594806463 | -4.139548923 |
| C | 2.124436545  | -2.142798657 | 0.663554059  |
| C | 3.247602201  | -2.091750716 | -0.178207863 |
| C | 2.209015241  | -1.883329161 | 2.039763454  |
| C | 4.464302413  | -1.710324846 | 0.391218941  |
| C | 3.452515121  | -1.508915794 | 2.555363190  |
| C | 4.587005842  | -1.401604077 | 1.748502465  |
| H | 5.346882162  | -1.657102066 | -0.252533448 |
| H | 3.534253426  | -1.301058309 | 3.626208467  |
| C | -3.267145802 | -2.095084379 | 1.178264729  |
| H | -2.840700759 | -1.185798001 | 1.628796476  |
| H | -4.231715433 | -2.281146598 | 1.670238203  |
| H | -2.592316558 | -2.927550033 | 1.425810946  |
| C | -1.481169115 | -2.346391861 | -3.563477134 |
| H | -1.845820596 | -2.315251077 | -4.598875108 |
| H | -0.668618968 | -1.607610568 | -3.457698894 |
| H | -1.040547340 | -3.340827743 | -3.388403546 |
| C | -6.253403431 | -0.976003379 | -2.713919304 |
| H | -7.069850338 | -1.259724999 | -2.034330910 |
| H | -6.284431601 | 0.120951456  | -2.823760874 |
| H | -6.462479314 | -1.407482363 | -3.703699866 |
| C | 1.019236446  | -2.000351216 | 2.947505064  |
| H | 1.340817883  | -2.144643210 | 3.988059441  |
| H | 0.401410302  | -1.089946618 | 2.919270991  |
| H | 0.367635596  | -2.842573840 | 2.672070957  |
| C | 3.152863932  | -2.430616459 | -1.634774168 |
| H | 2.502994492  | -1.709698411 | -2.158644324 |
| H | 4.145430426  | -2.407159312 | -2.103994692 |
| H | 2.726487592  | -3.433912651 | -1.793764049 |
| C | 5.900923296  | -0.952732185 | 2.319778458  |
| H | 6.015779112  | 0.139491213  | 2.217914727  |
| H | 5.980925027  | -1.191590497 | 3.390104808  |

|    |              |              |              |
|----|--------------|--------------|--------------|
| H  | 6.749546573  | -1.418651247 | 1.798017327  |
| C  | -0.823459819 | 0.579771494  | 1.210117527  |
| O  | -1.294776415 | 0.726094131  | 2.254220303  |
| C  | 0.039702433  | 2.250574017  | -0.706982757 |
| O  | 0.119757590  | 3.374984283  | -0.884374481 |
| Cl | 0.900085055  | 0.146719028  | -2.615724497 |

### Ligands

#### MeCN

SCF-energy: -132.4921811

SCF + E(vib0): -132.4467809

|   |             |             |              |
|---|-------------|-------------|--------------|
| N | 3.549862271 | 2.112563390 | -2.236035740 |
| C | 3.618907604 | 2.010891956 | -1.085719275 |
| H | 4.755926364 | 1.930346602 | 0.682902298  |
| C | 3.706661507 | 1.879005777 | 0.358733475  |
| H | 3.146635208 | 2.686925608 | 0.851008755  |
| H | 3.286950117 | 0.914611076 | 0.679075971  |

#### Pyridine

SCF-energy: -247.8110426

SCF + E(vib0): -247.7215867

|   |             |             |              |
|---|-------------|-------------|--------------|
| H | 3.651501843 | 2.709308324 | -3.324664712 |
| C | 3.584513036 | 2.682770921 | -2.230414206 |
| N | 2.499774697 | 2.107276337 | -1.718059015 |
| C | 2.391502597 | 2.060514463 | -0.392742395 |
| H | 1.489092618 | 1.581792603 | 0.006163110  |
| H | 3.208771386 | 2.512960630 | 1.558831607  |
| H | 5.257655988 | 3.601349667 | 0.578284326  |
| C | 4.482188175 | 3.181128918 | -0.067511317 |
| C | 3.350352082 | 2.580059146 | 0.477786534  |
| C | 4.604030575 | 3.234777162 | -1.453835999 |
| H | 5.472683322 | 3.695687508 | -1.929532775 |



1. Torres, O.; Martín, M.; Sola, E., Labile N-Heterocyclic Carbene Complexes of Iridium. *Organometallics* 2009, **28**, 863-870.
2. Fekete, M.; Bayfield, O.; Duckett, S. B.; Hart, S.; Mewis, R. E.; Pridmore, N.; Rayner, P. J.; Whitwood, A., Iridium(III) Hydrido N-Heterocyclic Carbene-Phosphine Complexes as Catalysts in Magnetization Transfer Reactions. *Inorg. Chem.* 2013, **52**, 13453-13461.
3. Cowley, M. J.; Adams, R. W.; Atkinson, K. D.; Cockett, M. C. R.; Duckett, S. B.; Green, G. G. R.; Lohman, J. A. B.; Kersebaum, R.; Kilgour, D.; Mewis, R. E., Iridium N-Heterocyclic Carbene Complexes as Efficient Catalysts for Magnetization Transfer from para-Hydrogen. *JACS* 2011, **133**, 6134-6137.
4. Duckett, S. B.; Mewis, R. E., Application of Parahydrogen Induced Polarization Techniques in NMR Spectroscopy and Imaging. *Acc. Chem. Res.* 2012, **45**, 1247-1257.
5. Kelly III, R. A.; Clavier, H.; Giudice, S.; Scott, N. M.; Stevens, E. D.; Bordner, J.; Samardjiev, I.; Hoff, C. D.; Cavallo, L.; Nolan, S. P., Determination of N-Heterocyclic Carbene (NHC) Steric and Electronic Parameters using the [(NHC)Ir(CO)<sub>2</sub>Cl] System. *Organometallics* 2008, **27**, 202-210.
6. Aguilar, J. A.; Adams, R. W.; Duckett, S. B.; Green, G. G. R.; Kandiah, R., Selective detection of hyperpolarized NMR signals derived from para-hydrogen using the Only Para-hydrogen Spectroscopy (OPSY) approach. *J. Mag. Res.* 2011, **208**, 49-57.
7. Aguilar, J. A.; Elliott, P. I. P.; Lopez-Serrano, J.; Adams, R. W.; Duckett, S. B., Only para-hydrogen spectroscopy (OPSY), a technique for the selective observation of para-hydrogen enhanced NMR signals. *Chem. Commun.* 2007, 1183-1185.
8. Zhu, J. M.; Smith, I. C. P., Selection of Coherence Transfer Pathways By Pulsed-Field Gradients in NMR-Spectroscopy. *Concepts Magn. Reson.* 1995, **7**, 281-291.
9. Mewis, R. E.; Atkinson, K. D.; Cowley, M. J.; Duckett, S. B.; Green, G. G. R.; Green, R. A.; Highton, L. A. R.; Kilgour, D.; Lloyd, L. S.; Lohman, J. A. B., et al., Probing signal amplification by reversible exchange using an NMR flow system. *Magn. Reson. Chem.* 2014, **52**, 358-369.
10. Adamo, C.; Barone, V., Toward reliable density functional methods without adjustable parameters: The PBE0 model. *J. Chem. Phys.* 1999, **110**, 6158-6170.
11. Andrae, D.; Haussermann, U.; Dolg, M.; Stoll, H.; Preuss, H., Energy-Adjusted ab initio Pseudopotentials for the 2nd and 3rd Row Transition-Elements - Molecular Test For Ag<sub>2</sub>, Au<sub>2</sub> and RuH, OsH. *Theoretica Chimica Acta* 1991, **78**, 247-266.
12. Weigend, F.; Ahlrichs, R., Balanced basis sets of split valence, triple zeta valence and quadruple zeta valence quality for H to Rn: Design and assessment of accuracy. *PCCP* 2005, **7**, 3297-3305.
13. Andrae, D.; Haussermann, U.; Dolg, M.; Stoll, H.; Preuss, H., Energy-Adjusted ab initio Pseudopotentials for the 2nd and 3rd Row Transition-Elements *Theoretica Chimica Acta* 1990, **77**, 123-141.
14. TURBOMOLE V6.4 2012, a development of University of Karlsruhe and Forschungszentrum Karlsruhe GmbH, 1989-2007, TURBOMOLE GmbH, since 2007; available from <http://www.turbomole.com>.
15. Deglmann, P.; May, K.; Furche, F.; Ahlrichs, R., Nuclear second analytical derivative calculations using auxiliary basis set expansions. *Chem. Phys. Lett.* 2004, **384**, 103-107.
16. Grimme, S.; Furche, F.; Ahlrichs, R., An improved method for density functional calculations of the frequency-dependent optical rotation. *Chem. Phys. Lett.* 2002, **361**, 321-328.
17. Weigend, F., Accurate Coulomb-fitting basis sets for H to Rn. *Phys. Chem. Chem. Phys.* 2006, **8**, 1057-1065.
18. Boys, S. F.; Bernardi, F., Calculation of small molecular interactions by differences of separate total energies - some procedures with reduced errors *Mol. Phys.* 1970, **19**, 553-553.
19. Simon, S.; Duran, M.; Dannenberg, J. J., How does basis set superposition error change the potential surfaces for hydrogen bonded dimers? *J. Chem. Phys.* 1996, **105**, 11024-11031.
20. M. J. Frisch, G. W. T., H. B. Schlegel, G. E. Scuseria, ; M. A. Robb, J. R. C., G. Scalmani, V. Barone, B. Mennucci, ; G. A. Petersson, H. N., M. Caricato, X. Li, H. P. Hratchian, ; A. F. Izmaylov, J. B., G. Zheng, J. L. Sonnenberg, M. Hada, ; M. Ehara, K. T., R. Fukuda, J. Hasegawa, M. Ishida, T. Nakajima, ; Y. Honda, O. K., H. Nakai, T. Vreven, J. A. Montgomery, Jr., ; J. E. Peralta, F. O., M. Bearpark, J. J. Heyd, E. Brothers, ; K. N. Kudin, V. N. S., T. Keith, R. Kobayashi, J. Normand, ; K. Raghavachari, A. R., J. C. Burant, S. S. Iyengar, J. Tomasi, ; M. Cossi, N. R., J. M. Millam, M. Klene, J. E. Knox, J. B. Cross, , et al., Gaussian 09, Revision B.01,.
21. Cances, E.; Mennucci, B., New applications of integral equations methods for solvation continuum models: ionic solutions and liquid crystals. *J. Math. Chem.* 1998, **23**, 309-326.
22. Cances, E.; Mennucci, B.; Tomasi, J., A new integral equation formalism for the polarizable continuum model: Theoretical background and applications to isotropic and anisotropic dielectrics. *J. Chem. Phys.* 1997, **107**, 3032-3041.
23. Mennucci, B.; Cances, E.; Tomasi, J., Evaluation of solvent effects in isotropic and anisotropic dielectrics and in ionic solutions with a unified integral equation method: Theoretical bases, computational implementation, and numerical applications. *J. Phys. Chem. B* 1997, **101**, 10506-10517.
24. Marenich, A. V.; Cramer, C. J.; Truhlar, D. G., Universal Solvation Model Based on Solute Electron Density and on a Continuum Model of the Solvent Defined by the Bulk Dielectric Constant and Atomic Surface Tensions. *J. Phys. Chem. B* 2009, **113**, 6378-6396.
25. Fomine, S.; Tlenkopatchev, M. A., Computational Modeling of Renewable Molecules. Ruthenium Alkylidene-Mediated Metathesis of Trialkyl-Substituted Olefins. *Organometallics* 2010, **29**, 1580-1587.

26. Tamura, H.; Yamazaki, H.; Sato, H.; Sakaki, S., Iridium-Catalyzed Borylation of Benzene with Diboron. Theoretical Elucidation of Catalytic Cycle Including Unusual Iridium(V) Intermediate. *J. Am. Chem. Soc.* 2003, *125*, 16114-16126.
27. Sumimoto, M.; Iwane, N.; Takahama, T.; Sakaki, S., Theoretical Study of Trans-metalation Process in Palladium-Catalyzed Borylation of Iodobenzene with Diboron. *J. Am. Chem. Soc.* 2004, *126*, 10457-10471.
28. Sakaki, S.; Takayama, T.; Sumimoto, M.; Sugimoto, M., Theoretical Study of the Cp<sub>2</sub>Zr-Catalyzed Hydrosilylation of Ethylene. Reaction Mechanism Including New  $\sigma$ -Bond Activation. *J. Am. Chem. Soc.* 2004, *126*, 3332-3348.
29. Vetere, V.; Adamo, C.; Maldivi, P., Performance of the 'parameter free' PBE0 functional for the modeling of molecular properties of heavy metals. *Chem. Phys. Lett.* 2000, *325*, 99-105.
30. Xu, X.; Fang, L.; Chen, Z. X.; Yang, G. C.; Sun, S. L.; Su, Z. M., Quantum chemistry studies on the Ru-M interactions and the P-31 NMR in Ru(CO)(3)(Ph(2)Ppy)(2)(MCl2) (M = Zn, Cd, Hg). *J. Organomet. Chem.* 2006, *691*, 1927-1933.
31. Merrick, J. P.; Moran, D.; Radom, L., An Evaluation of Harmonic Vibrational Frequency Scale Factors. *J. Phys. Chem. A* 2007, *111*, 11683-11700.
